1 ***Schistosoma haematobium* extracellular vesicle proteins confer protection in a**  
2 **heterologous model of schistosomiasis**

3 Gebeyaw G. Mekonnen<sup>1,2\*</sup>, Bemnet A. Tedla<sup>1\*</sup>, Darren Pickering<sup>1</sup>, Luke Becker<sup>1</sup>, Lei  
4 Wang<sup>3,5</sup>, Bin Zhan<sup>3</sup>, Maria Elena Bottazzi<sup>3</sup>, Alex Loukas<sup>1#</sup>, Javier Sotillo<sup>4#</sup> and Mark S.  
5 Pearson<sup>1#</sup>

6 <sup>1</sup>Centre for Molecular Therapeutics, Australian Institute of Tropical Health and Medicine,  
7 James Cook University, Cairns, Queensland, Australia.

8 <sup>2</sup>Department of Medical Parasitology, School of Biomedical and Laboratory Sciences,  
9 College of Medicine and Health Sciences, University of Gondar, Gondar, Ethiopia.

10 <sup>3</sup>Texas Children's Hospital Center for Vaccine Development, Department of Pediatrics  
11 and National School of Tropical Medicine, Baylor College of Medicine, Houston, TX,  
12 USA.

13 <sup>4</sup>Parasitology Reference and Research Laboratory, Centro Nacional de Microbiología,  
14 Instituto de Salud Carlos III, Majadahonda, Madrid, Spain.

15 <sup>5</sup>Beijing Institute of Tropical Medicine, Beijing Friendship Hospital, Beijing, China

16

17

18 \*Both authors contributed equally.

19 #Corresponding authors:

20 Dr Mark S. Pearson. Centre for Molecular Therapeutics, Australian Institute of Tropical  
21 Health and Medicine, James Cook University, Cairns, Queensland, Australia. Email:  
22 [mark.pearson@jcu.edu.au](mailto:mark.pearson@jcu.edu.au)

23 Dr Javier Sotillo. Centro Nacional de Microbiología, Instituto de Salud Carlos III,  
24 Majadahonda, Madrid, Spain. Email: [javier.sotillo@isciii.es](mailto:javier.sotillo@isciii.es)

25 Prof Alex Loukas. Centre for Molecular Therapeutics, Australian Institute of Tropical  
26 Health and Medicine, James Cook University, Cairns, Queensland, Australia. Email:  
27 alex.loukas@jcu.edu.au

28

29 **Abstract**

30 Helminth parasites release extracellular vesicles which interact with the surrounding host  
31 tissues, mediating host-parasite communication and other fundamental processes of  
32 parasitism. As such, vesicle proteins present attractive targets for the development of  
33 novel intervention strategies to control these parasites and the diseases they cause. Herein,  
34 we describe the first proteomic analysis by LC-MS/MS of two types of extracellular  
35 vesicles (exosome-like, 120k pellet vesicles and microvesicle-like, 15k pellet vesicles)  
36 from adult *Schistosoma haematobium* worms. A total of 57 and 330 proteins were  
37 identified in the 120k pellet vesicles and larger 15k pellet vesicles, respectively, and some  
38 of the most abundant molecules included homologues of known helminth vaccine and  
39 diagnostic candidates such as *Sm*-TSP2, *Sm*23, glutathione S-transferase, saposins and  
40 aminopeptidases. Tetraspanins were highly represented in the analysis and found in both  
41 vesicle types. Vaccination of mice with recombinant versions of three of these  
42 tetraspanins induced protection in a heterologous challenge (*S. mansoni*) model of  
43 infection, resulting in significant reductions (averaged across two independent trials) in  
44 liver (47%, 38% and 41%) and intestinal (47%, 45% and 41%) egg burdens. These  
45 findings offer insight into the mechanisms by which anti-tetraspanin antibodies confer  
46 protection and highlight the potential that extracellular vesicle surface proteins offer as  
47 anti-helminth vaccines.

48

49 **Keywords:** *Schistosoma haematobium*, schistosomiasis, extracellular vesicles,  
50 exosome-like vesicles, microvesicles, tetraspanin, vaccine

51

## 52 **1. Introduction**

53 Schistosomiasis is the second most important parasitic disease, only after malaria,  
54 in terms of social, economic and public health impact [1]. *Schistosoma haematobium*, the  
55 causative agent of urogenital schistosomiasis, is highly prevalent in 53 Middle East and  
56 African countries [1] and it is also sporadically seen in India [2] and France [3]. Urogenital  
57 schistosomiasis affects more than 90 million people, mostly in sub-Saharan Africa where  
58 180 million inhabitants are at risk, and is responsible for 150,000 deaths per year [4].  
59 Furthermore, the most common complications associated with this disease include  
60 schistosomal haematuria, bladder wall pathology, hydronephrosis, and dysuria [4].

61 The current control programs against schistosomiasis are aimed at reducing the  
62 morbidity caused by the parasite by regularly treating infected populations with  
63 praziquantel [5]. Despite the efforts made to control this devastating disease,  
64 schistosomiasis is still spreading to new geographical areas [3,6]. Furthermore,  
65 praziquantel has shown reduced efficacy in field studies [7] and is not effective against  
66 the immature stages of the parasite [8,9]. Hence, a vaccine that reduces disease severity  
67 and/or reduces transmission is needed to control and eliminate schistosomiasis [10,11].  
68 Despite efforts over decades, there is no licensed vaccine [1,12]. Even though various  
69 vaccine candidates have advanced into clinical trials targeting *Schistosoma mansoni*, the  
70 causative agent of intestinal schistosomiasis, the only vaccine candidate against *S.*  
71 *haematobium* to have progressed into clinical trial is a glutathione S-transferase  
72 recombinant protein, Sh28GST. However, results from a phase 3 trial conducted from  
73 2009 to 2012 in *S. haematobium* infected children did not report any significant efficacy  
74 due to the vaccine [13]. Therefore, it is important to continue identifying new target  
75 antigens in the effort to develop a vaccine against *S. haematobium* and the other species  
76 of schistosomes [10,12].

77           *S. haematobium* adult worms live in the perivesicular veins where they can survive  
78 for years using evasion strategies to remain undetected by the host immune system. One  
79 of the main strategies the parasite's employ to hijack the immune effector response is to  
80 release a suite of immunomodulatory excretory/secretory (ES) products. ES products  
81 comprise different proteins, glycans, lipids, and nucleic acids [14], and have been the focus  
82 of different studies aiming at understanding the molecular basis of host-parasite  
83 interactions and the subsequent use of this information to develop novel therapeutics and  
84 diagnostics [15-18]. Recently, it has been documented that the ES products from different  
85 helminths (including schistosomes) contain extracellular vesicles (EV)s [19-22]. EVs are  
86 membrane-bound organelles released by cells that can act as mediators of intercellular  
87 communication by transferring molecular signals mediated by proteins, lipids,  
88 metabolites, mRNAs, microRNAs and other non-coding RNA species [23,24]. In addition  
89 to the transmission of information between cells within the same organism, recent studies  
90 have shown that EVs secreted by parasitic helminths are taken up by host cells within the  
91 parasite's niche tissue and provide a means of inter-species communication [19,25-38]. For  
92 instance, EVs from trematodes and nematodes can be internalised by host cells  
93 whereupon they suppress effector immune responses [37,39,40], or in contrast, some  
94 helminth EVs contribute to pathogenesis by promoting cell proliferation and  
95 inflammatory cytokine production [29].

96           EVs from helminths also contain vaccine candidate antigens. For example, EVs  
97 from *S. mansoni* contain molecules that have known vaccine efficacy in animal models  
98 of schistosomiasis [27], and vaccination of mice with helminth EVs stimulates the  
99 production of protective immune responses that significantly reduce faecal egg counts,  
100 worm burdens and symptom severity and mortality induced by infection after parasite  
101 challenge [25,41-44]. Moreover, antibodies produced against recombinant forms of

102 *Opisthorchis viverrini* EV surface proteins hinders the uptake of EVs by cholangiocytes  
103 and suppresses the immune response that fuels pathogenesis [29,42].

104 In addition to other molecules, helminth EVs contain tetraspanins (TSPs), which  
105 have been shown to be effective vaccine candidates against *Schistosoma* spp. [21,27]. The  
106 TSPs *Sm23*, *Sm-TSP-1* and *Sm-TSP-2*, all found in the membrane of *S. mansoni* EVs  
107 [20,27], have displayed partial efficacy in when used as adjuvanted subunit vaccines [45-  
108 47], and *Sm-TSP-2* has successfully completed phase I clinical trials [48]. TSPs from other  
109 helminth species, including *S. japonicum* and *O. viverrini*, have also been shown to be  
110 efficacious vaccine candidates in animal challenge models of infection [42,49].

111 Although there are reports describing EVs and the vaccine efficacy of EV-derived  
112 molecules from other schistosomes, no studies have been conducted on *S. haematobium*.  
113 Herein, we have characterized for the first time the proteomic composition of small (120k  
114 pellet) and large (15k pellet) subclasses of EVs from this parasite, and selected three of  
115 the EV surface TSPs for assessment as subunit vaccines in a heterologous challenge  
116 mouse challenge model of schistosomiasis.

117

## 118 **2. Materials and methods**

### 119 *2.1 Parasite material and experimental animals*

120 *Bulinus truncatus* snails infected with *S. haematobium* (Egyptian strain) were  
121 provided by the Biomedical Research Institute, MD, USA, and maintained in aquaria in  
122 a 27°C incubator. Male BALB/c mice were purchased from the Animal Resource Centre,  
123 Canningvale, Western Australia, and maintained at the Australian Institute of Tropical  
124 Health and Medicine (AITHM) animal facility in cages under controlled temperature and  
125 light with free access to pelleted food and water. All experimental procedures performed

126 on animals in this study were approved by the James Cook University (JCU) animal ethics  
127 committee (A2391). All experiments were performed in accordance with the 2007  
128 Australian Code of Practice for the Care and Use of Animals for Scientific Purposes and  
129 the 2001 Queensland Animal Care and Protection Act.

130 To obtain cercariae, snails were removed from the tank with a pair of forceps and  
131 washed several times with water to remove debris and rotifers, transferred to a Petri dish  
132 and incubated without water at 27°C in the dark for 2 h. Water was then added and the  
133 snails were placed under light for 1.5 h at 28°C. Cercariae were concentrated using a 20  
134 µm pore size sieve and, finally, each BALB/c mouse (6 week-old) was infected with  
135 1,000 cercariae by tail penetration [50].

136

## 137 2.2 Adult worm culture, ES collection and EV purification

138 *S. haematobium* adult worms were obtained by perfusion of mice at 16 weeks  
139 post-infection and parasites were washed several times with serum-free modified Basch  
140 media supplemented with 4× antibiotic/antimycotic (SFB) [20] and then incubated in SFB  
141 (50 pairs/5 ml) at 37°C in with 5% CO<sub>2</sub> for 2 weeks. ES products were harvested daily,  
142 differentially centrifuged at 4°C (500 g, 2,000 g and 4,000 g for 30 min each) to remove  
143 large parasite material such as eggs and tegumental debris and stored at -80°C until use.

144 EVs were isolated using established methods previously described for *S. mansoni*  
145 [20]. Stored supernatants were thawed on ice, concentrated at 4°C using a 10 kDa spin  
146 concentrator (Merck Millipore, USA) and centrifuged for 1 h at 15,000 g at 4°C. The  
147 resultant pellet (containing 15k vesicles) was washed with 1 ml of PBS, centrifuged at  
148 15,000 g for 1 h at 4°C, resuspended in 200 µl PBS and stored at -80°C. The supernatant  
149 was ultracentrifuged at 120,000 g for 3 h at 4°C using an MLS-50 rotor (Beckman

150 Coulter, USA) to collect 120k pellet vesicles. The resultant pellet was resuspended in 70  
151  $\mu$ l of PBS and subjected to Optiprep® density gradient (ODG) separation. The ODG was  
152 prepared by diluting a 60% Iodixanol solution (Optiprep®, Sigma-Aldrich, USA) with  
153 0.25 M sucrose in 10 mM Tris-HCl pH 7.2 to make 40%, 20%, 10% and 5% iodixanol  
154 solutions, and 1.0 ml of these solutions was layered in decreasing density in an  
155 ultracentrifuge tube. The resuspended 120k pellet vesicles were added to the top layer  
156 and ultracentrifuged at 120,000 g for 18 h at 4°C. A control tube was similarly prepared  
157 using PBS instead of the 120k pellet vesicle sample to measure the density of the different  
158 fractions recovered from the gradient. Fractions obtained from the ODG were diluted with  
159 8 ml of PBS containing 1  $\times$  EDTA-free protease inhibitor cocktail (Santa Cruz, USA),  
160 and concentrated using a 10 kDa spin concentrator to remove the excess Optiprep®  
161 solution.

162         The density of different fractions obtained from the ODG (12 each for the sample  
163 and control) was calculated by measuring the absorbance of each fraction at 340 nm using  
164 a POLARstar Omega (BMG Labtech, Australia) spectrophotometer and interpolating the  
165 absorbance in a standard curve as previously shown [27]. The protein concentration of all  
166 fractions was quantified using the Quick Start™ Bradford Protein Assay Kit (Bio-Rad  
167 Laboratories, Inc. Life Science Research, USA) following the manufacturer's  
168 instructions.

169

### 170 *2.3 Determination of the size and concentration of EVs*

171         The size distribution and particle concentration of the different fractions recovered  
172 after ODG, as well as the 15k vesicle fraction, was measured using tunable resistive pulse  
173 sensing (TRPS) using a qNano instrument (Izon, New Zealand) following an established



174 protocol [34]. A Nanopore NP150 and a NP400 (Izon, New Zealand) were used to measure  
175 each fraction containing 120k pellet vesicles and the 15k pellet vesicle fraction,  
176 respectively. Thirty-five  $\mu\text{l}$  of measurement electrolyte (Izon, New Zealand) was added  
177 to the upper fluid well and maximum pressure was applied; the shielding lid was clicked  
178 5 to 10 times to wet the Nanopore. Then, 75  $\mu\text{l}$  of measurement electrolyte was added to  
179 the lower fluid well, maximum pressure and an appropriate voltage (0.1 V) was applied  
180 and Nanopore current was checked for stability. Thirty-five (35) and 75  $\mu\text{l}$  of filtered  
181 coating solution (Izon, New Zealand) was loaded in the upper and lower fluid well,  
182 respectively, and maximum pressure was applied for 10 min followed by maximum  
183 vacuum for another 10 min. The coating solution was flushed out of the upper and lower  
184 fluid wells two to three times with measurement electrolyte, maximum pressure was  
185 applied for 10 min and the voltage was increased until the current reached between 120  
186 and 140 nA and the baseline current was stable. Then, 35  $\mu\text{l}$  of calibration particles  
187 (CP200 carboxylated polystyrene calibration particles; Izon, New Zealand) was loaded to  
188 the upper fluid well at a 1:200 dilution when calibrating for 120k pellet vesicle fractions  
189 and 1:1,500 when calibrating for the 15k pellet vesicle fraction, incubated for 2 min at  
190 maximum pressure and the stretch was reduced and the calibration particles were  
191 measured at 2 different pressures (P10 and P5). Then, the 120k and 15k pellet vesicle  
192 fractions were diluted 1:5, applied to the Nanopore and measured similarly to the  
193 calibration particles. The size and concentration of particles were determined using the  
194 software provided by Izon (version 3.2).

195

196

197

## 198 2.4 In- gel trypsin digestion of EVs

199 Fractions containing 120k pellet vesicles of sufficient size and concentration, and  
200 the 15k pellet vesicle fraction, were resuspended in 1 × loading buffer (10% glycerol, 80  
201 mM Tris-HCl, 2% SDS, 0.01% bromophenol blue and 1.25% beta-mercaptoethanol, pH  
202 6.8), boiled at 95°C for 5 min and electrophoresed in a 15% SDS-PAGE gel at 100 V.  
203 The gel was stained with 0.03% Coomassie Brilliant Blue (40% methanol, 10% acetic  
204 acid and 50% water) for 30 min at room temperature (RT) with gentle shaking and  
205 destained using destaining buffer 1 (60% water, 10% acetic acid and 30% methanol) for  
206 1 h at RT with gentle shaking. Each lane was sliced into 3 pieces with a surgical blade  
207 and placed into a fresh Eppendorf tube. Then, slices were further destained 3 times using  
208 destaining buffer 2 (50% acetonitrile (ACN), 20% ammonium bicarbonate and 30%  
209 milliQ water) by adding 200 µl of buffer to the gel slice, and incubating at 37°C for 45  
210 min. Supernatants were discarded and, finally, gel slices were dried in a vacuum  
211 concentrator (LabGear, Australia) on low/high medium heat (< 45°C). One hundred (100)  
212 µl of reduction buffer (20 mM dithiothreitol, 25 mM ammonium bicarbonate) was added  
213 to each dried slice, incubated at 65°C for 1 h and supernatants were discarded. Alkylation  
214 was achieved by adding 100 µl of alkylation buffer (50 mM iodoacetamide, 25 mM  
215 ammonium bicarbonate) to each gel slice, which were further incubated in darkness for  
216 40 min at RT. Gel slices were washed with 200 µl of wash buffer (25 mM ammonium  
217 bicarbonate) and incubated at 37°C for 15 min twice after the gel slices were dried in a  
218 speedivac. For trypsin digestion, a total of 2 µg of trypsin (Sigma-Aldrich, USA) was  
219 added to each gel slice and incubated for 5 min at RT. Finally, 50 µl of trypsin reaction  
220 buffer (40 mM ammonium bicarbonate, 9% ACN) was added to gel slices and incubated  
221 overnight at 37°C. Peptides were extracted in 50% acetonitrile with 0.1% trifluoroacetic  
222 acid. The last step was performed three times to maximize peptide recovery. All peptides

223 were finally dried in a vacuum concentrator. Samples were then resuspended in 10  $\mu$ l of  
224 0.1% trifluoroacetic acid and tryptic peptides were desalted using a Zip-Tip® column  
225 (Merck Millipore) pipette tip according to the manufacturer's protocol and dried in a  
226 vacuum concentrator before analysis using liquid chromatography-tandem mass  
227 spectrometry (LC-MS/MS).

228

### 229 *2.5 LC-MS/MS analysis, database search and bioinformatic analysis*

230 Each ELV and MV preparation were reconstituted in 10  $\mu$ l of 5% formic acid and  
231 injected onto a 50 mm 300  $\mu$ m C18 trap column (Agilent Technologies, USA). The  
232 samples were then desalted for 5 min at 30  $\mu$ l/min using 0.1% formic acid and the peptides  
233 were then eluted onto an analytical nano-HPLC column (150 mm  $\times$  75  $\mu$ m 300SBC18,  
234 3.5  $\mu$ m, Agilent Technologies, USA) at a flow rate of 300 nL/min. Peptides were  
235 separated using a 95 min gradient of 1–40% buffer B (90/10 ACN/0.1% formic acid)  
236 followed by a steeper gradient from 40 to 80% buffer B in 5 min. A 5600 ABSciex mass  
237 spectrometer operated in information-dependent acquisition mode, in which a 1 s TOF-  
238 MS scan from 350–1400  $m/z$  was used, and for product ion  $ms/ms$  80–1400  $m/z$  ions  
239 observed in the TOF-MS scan exceeding a threshold of 100 counts and a charge state of  
240 +2 to +5 were set to trigger the acquisition of product ion. Analyst 1.6.1 (ABSCIEX,  
241 Framingham, MA, USA) software was used for data acquisition.

242 For database search and protein identification, a database was built using a  
243 concatenated target/decoy version of the *S. haematobium* predicted proteome [51,52]  
244 sequences; Bioproject PRJNA78265 downloaded from Parasite WormBase  
245 ([www.parasite.wormbase.org](http://www.parasite.wormbase.org)) and concatenated to the common repository of  
246 adventitious proteins (cRAP, <https://www.thegpm.org/crap/>), as well as to the *Sh*-TSP-2

247 protein (Genbank QCO69687.1). Database search was performed using a combination of  
248 four search engines - X! Tandem version X! Tandem Vengeance (2015.12.15.2) [53], MS-  
249 GF+ version Release (v2018.04.09) [54], OMSSA and Tide [55]) using SearchGUI version  
250 v3.3.3[56]. The identification settings were as follows: Trypsin, Specific, with a maximum  
251 of 2 missed cleavages 10.0 ppm as MS1 and 0.2 Da as MS2 tolerances; fixed  
252 modifications: Carbamidomethylation of C (+57.021464 Da), variable modifications:  
253 Deamidation of N (+0.984016 Da), Deamidation of Q (+0.984016 Da), Oxidation of M  
254 (+15.994915 Da). Peptides and proteins were inferred from the spectrum identification  
255 results using PeptideShaker version 1.16.38[56]. Peptide Spectrum Matches (PSMs),  
256 peptides and proteins were validated at a 1.0% False Discovery Rate (FDR) estimated  
257 using the decoy hit distribution. Only proteins having at least two unique peptides were  
258 considered as identified. The mass spectrometry proteomics data have been deposited in  
259 the ProteomeXchange Consortium via the PRIDE partner repository with the dataset  
260 identifier PXD019462 and 10.6019/PXD019462 (Username: [reviewer46995@ebi.ac.uk](mailto:reviewer46995@ebi.ac.uk)  
261 Password: 03jNpGFk),

262 Protein family (Pfam) domains were classified using HMMER v3.1b1 [57] and  
263 protein gene ontology (GO) categories were classified using Blast2GO v5.2 [58]. ReviGO  
264 was used to visualise GO terms using semantic similarity-based scatterplots [59].  
265 TMHMM [60] and SignalP 4.1 [61] software were used to predict transmembrane domains  
266 and putative signal peptides, respectively.

267

## 268 *2.6 Cloning and expression of Sh-TSP2 and MS3\_09198 in Pichia pastoris*

269 DNA sequences encoding the large extracellular loop (LEL) regions of the TSPs  
270 *Sh-TSP2* and *MS3\_01370* (predicted using TMPRED) were codon optimized based on

271 yeast codon usage preference and synthesized by GenScript (NJ, US). The synthesized  
272 coding DNAs with a 6-His-tag expressed at the C-terminus were cloned into the pPink $\alpha$ -  
273 HC expression vector (ThermoFisher, US) using *XhoI/KpnI* restriction sites. The  
274 recombinant plasmids with correct insert confirmed by double-strand DNA sequencing  
275 were linearized with *AflIII*, and then transformed by electroporation into PichiaPink™  
276 Strain 4 with endogenous proteinases A and B knocked out to prevent degradation of  
277 expressed proteins. The transformants were selected on PAD (Pichia Adenine Dropout)  
278 agar plates and the expression yield of picked colonies was evaluated in 10 mL BMMY  
279 medium with 0.5% methanol for 72h. The clones with highest expression yield were used  
280 to express recombinant *Sh*-TSP2 and MS3\_01370 in 2L BMMY under induction of 0.5%  
281 methanol at 30°C with 250 rpm shaking for 72 h. The culture medium containing the  
282 secreted proteins was harvested by centrifugation (5000 g for 20 min at RT) and filtered  
283 through a 0.22  $\mu$ m membrane filter (Millipore). Recombinant proteins were purified by  
284 immobilized metal affinity chromatography (IMAC) using a prepacked 5 ml His-Trap HP  
285 column (GE Healthcare). The purified recombinant proteins were buffer-exchanged in 1  
286  $\times$  PBS, pH7.4. The purity of the proteins was analyzed by SDS-PAGE and the  
287 concentration was measured by OD<sub>280</sub>. The low endotoxin contamination was confirmed  
288 by Endosafe® cartridge (Charles River). The purified recombinant proteins were  
289 aliquoted and stored at -80°C.

290

### 291 2.7 Cloning and expression of MS3\_01370 in *Escherichia coli*

292 Unlike *Sh*-TSP2 and MS3\_09198, we were unsuccessful at expressing the LEL  
293 region of MS3\_01370 in soluble form in *P. pastoris*, so the protein was expressed as a  
294 thioredoxin (TrX) fusion in *E. coli*. Primers incorporating *NcoI* (forward primer) and *XhoI*  
295 restriction enzyme sites (reverse primer) were used to amplify the LEL of MS3\_09198

296 from *S. haematobium* cDNA and the amplicon was cloned into the pET32a expression  
297 vector (Novagen), in-frame with the N-terminal TrX tag. Protein expression was induced  
298 for 24 h in *E. coli* BL21(DE3) by addition of 1 mM Isopropyl beta-D-1-  
299 thiogalactopyranoside (IPTG) using standard methods. The culture was harvested by  
300 centrifugation (8,000 g for 20 min at 4°C), re-suspended in 50 ml lysis buffer (50 mM  
301 sodium phosphate, pH 8.0, 300 mM NaCl, 40 mM imidazole) and stored at -80°C. The  
302 cell pellet was lysed by three freeze-thaw cycles at -80°C and 42°C followed by  
303 sonication on ice (10 × 5 sec pulses [70% amplitude] with 30 s rest periods between each  
304 pulse) with a Qsonica Sonicator. Insoluble material was pelleted by centrifugation at  
305 20,000 g for 20 min at 4°C. The supernatant was diluted 1:4 in lysis buffer and filtered  
306 through a 0.22 µm membrane (Millipore). MS3\_01370 was purified by IMAC by loading  
307 onto a prepacked 1 ml His-Trap HP column (GE Healthcare) equilibrated with lysis buffer  
308 at a flow rate of 1 ml/min using an AKTA-pure-25 FPLC (GE Healthcare). After washing  
309 with 20 ml lysis buffer, bound His-tagged protein was eluted using the same buffer with  
310 a stepwise gradient of 50-250 mM imidazole (50 mM steps). Fractions containing  
311 MS3\_1370 (as determined by SDS-PAGE) were pooled and concentrated using Amicon  
312 Ultra-15 centrifugal devices with a 3 kDa MWCO and quantified using the Pierce BCA  
313 Protein Assay kit. The final concentration of MS3\_01370 was adjusted to 1 mg/ml and  
314 the protein was aliquoted and stored at -80°C.

315

## 316 *2.8 Vaccine formulation and immunization schedule*

317 Numbers of *S. haematobium* cercariae were insufficient to perform appropriately  
318 powered vaccination trials using an *S. haematobium* model of infection so vaccine  
319 experiments were instead performed using an *S. mansoni* challenge model [62]. Four  
320 groups of 10 BALB/c mice (6-8 weeks) were immunized intraperitoneally on day 1 with

321 either recombinant *Sh*-TSP-2, MS3\_09198, MS3\_01370 or TrX control protein (50  
322  $\mu\text{g}/\text{mouse}$ ), each formulated with an equal volume of Imject alum adjuvant  
323 (ThermoFisher) and 5  $\mu\text{g}$  of CpG ODN1826 (InvivoGen). Immunizations were repeated  
324 on days 15 and 29 and each mouse was challenged (tail penetration) with 120 *S. mansoni*  
325 cercariae on day 43. Blood was sampled at day 42 to determine pre-challenge antibody  
326 titers. Two independent trials were performed.

327

### 328 *2.9 Necropsy and estimation of parasite burden*

329 Mice were necropsied at day 91 (7 weeks post-infection) [62]. Blood was collected  
330 and worms harvested by vascular perfusion and counted. Livers were removed, weighed  
331 and digested for 5 h with 5% KOH at 37°C with shaking. Schistosome eggs from digested  
332 livers were concentrated by centrifugation at 1,000 g for 10 min and re-suspended in 1 ml  
333 of 10% formalin. The number of eggs in a 5  $\mu\text{l}$  aliquot was counted in triplicate and the  
334 number of eggs per gram (EPG) of liver tissue was calculated. Small intestines were  
335 removed and cleaned of debris before being weighed and digested as per the livers. Eggs  
336 were also similarly concentrated and counted to calculate intestinal EPG.

337

### 338 *2.10 Statistics*

339 All statistics were performed using GraphPad Prism 7.0. The reductions in worm  
340 and egg numbers were analysed using a Student's *t* test and results were expressed as the  
341 mean  $\pm$  standard error of the mean. For antibody titers, the reactivity cut-off values were  
342 determined as the mean + 3SD of the naive serum.

343

344 **3. Results**

345 *3.1 Density, protein concentration, particle concentration and purity of 120k and 15k*  
346 *pellet vesicles from Schistosoma haematobium*

347 *S. haematobium* adult worm 120k pellet vesicles were purified using an iodixanol  
348 gradient. The density of the 12 fractions obtained after gradient separation ranged from  
349 1.039 to 1.4 g/ml (Supplementary Table S1). The protein and particle concentration of  
350 the fractions ranged from 1.6 to 25.35 µg/ml and  $3.72 \times 10^6$  to  $2.06 \times 10^8$  particles/ml,  
351 respectively, while the protein and particle concentration of the 15k pellet vesicle fraction  
352 was 18.00 µg/ml and  $1.48 \times 10^7$  particles/ml, respectively. The size of the particles in the  
353 gradient-separated fractions ranged from 135 nm ± 19.3 to 342 nm ± 113.9 and size of  
354 particles in the 15k pellet vesicle fraction was 274 nm ± 40.7. Gradient-separated fractions  
355 having an appropriate purity and density corresponding to 120k pellet vesicles (1.09-1.22  
356 g/ml) [20,27] (fractions 5–9) were selected for further analysis (Fig. 1).

357



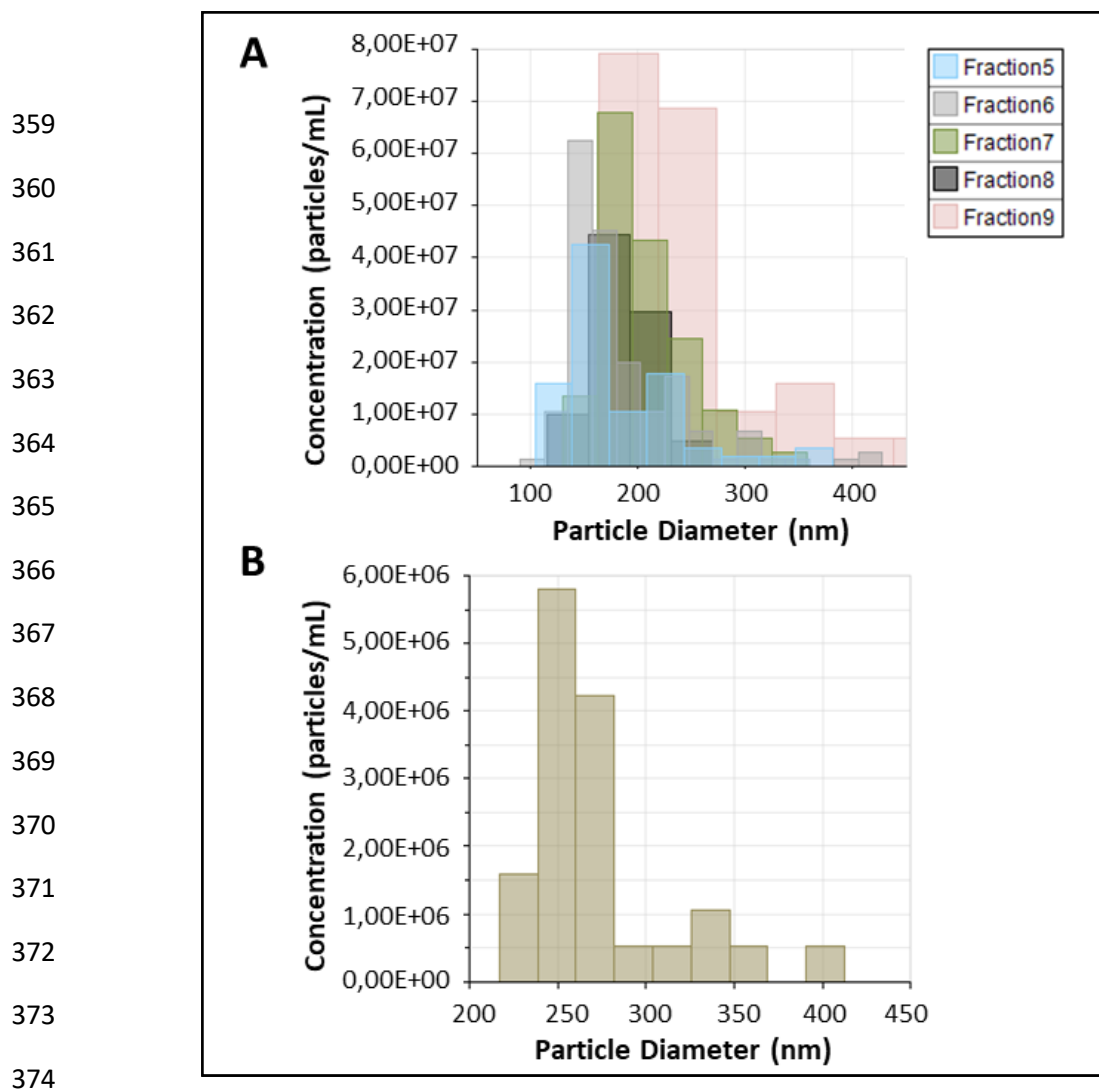

375 **Figure 1.** Tunable resistive pulse sensing analysis of 120k pellet vesicles and 15k pellet  
376 vesicles from *Schistosoma haematobium*. Size and number of EVs secreted by *S.*  
377 *haematobium* was analysed by qNano (iZon). (A) Size and concentration of particles in  
378 fractions containing 120k pellet vesicles (5-9). (B) Size and particle concentration of *S.*  
379 *haematobium* 15k pellet vesicles.

380

### 381 3.2 Proteomic analysis of *Schistosoma haematobium* 120k and 15k pellet vesicles

382 The proteome composition of *S. haematobium* adult worm EVs was characterised  
383 by LC-MS/MS. After combining the protein identified in fractions 5-9 (fractions  
384 containing the highest purity of 120k pellet vesicles), a total of 133 proteins matching *S.*  
385 *haematobium* proteins and common contaminants from the cRAP database were  
386 identified. From these, 80 proteins were identified with at least two validated unique

387 peptides and 57 of them matched *S. haematobium* proteins. From the 57 identified  
388 proteins, 8 (14%) contained a transmembrane domain and 7 (12%) had a signal peptide.  
389 In a similar fashion, 506 proteins were identified from analysis of the 15k pellet vesicles.  
390 From these, 344 proteins were identified with at least two validated unique peptides and  
391 330 matched *S. haematobium* proteins. From these identified proteins, 54 (16.3%)  
392 contained a transmembrane domain and 30 (9%) had a signal peptide. Forty proteins were  
393 identified in both types of vesicles. The identity of the most abundant proteins in each  
394 type of vesicle, as well as proteins having homologues typically found in other helminth  
395 EVs, are shown in Table 1. A full list of proteins identified in both 15k and 120k pellet  
396 vesicles is shown in Supplementary Tables S2 and S3.

397 **Table 1.** Proteins found in 120k and 15k pellet vesicles isolated from the ES products of adult *S. haematobium*\*

| <b>Protein category</b>                    | <b>Protein accession numbers</b>                                                                                                                                                     |
|--------------------------------------------|--------------------------------------------------------------------------------------------------------------------------------------------------------------------------------------|
| <i>120k vesicles</i>                       |                                                                                                                                                                                      |
| Proteasome subunit                         | MS3_10249.1, MS3_05734.1, MS3_01483.1, MS3_06009.1, MS3_04526.1, MS3_08808.1, MS3_07240.1, MS3_02807.1, MS3_09236.1, MS3_03070.1                                                     |
| GAPDH                                      | MS3_10141.1                                                                                                                                                                          |
| Papain family cysteine protease            | MS3_08498.1                                                                                                                                                                          |
| C-terminal domain of 1-Cys peroxiredoxin   | MS3_08460.1                                                                                                                                                                          |
| Ferritin-like domain                       | MS3_08059.1                                                                                                                                                                          |
| S-adenosyl-L-homocysteine hydrolase        | MS3_04449.1                                                                                                                                                                          |
| Cytosol amino peptidase                    | MS3_01749.1                                                                                                                                                                          |
| Trefoil (P-type) domain-containing protein | MS3_00004.1                                                                                                                                                                          |
| <i>15k vesicles</i>                        |                                                                                                                                                                                      |
| EF hand                                    | MS3_05735.1, MS3_00180.1, MS3_09846.1, MS3_05877.1, MS3_05317.1, MS3_04536.1, MS3_10043.1, MS3_05959.1, MS3_05150.1, MS3_04275.1, MS3_05958.1, MS3_05952.1, MS3_00361.1, MS3_02003.1 |
| Ras family                                 | MS3_10193.1, MS3_05953.1, MS3_05910.1, MS3_05976.1, MS3_07854.1, MS3_11139.1, MS3_02375.1, MS3_01653.1, MS3_04355.1, MS3_09110.1, MS3_09593.1, MS3_03443.1                           |
| TCP-1/cpn60 chaperonin family              | MS3_03054.1, MS3_06928.1, MS3_01627.1, MS3_10572.1, MS3_06669.1, MS3_07556.1, MS3_08399.1, MS3_00785.1, MS3_08926.1                                                                  |
| Tetraspanins                               | MS3_01905.1, MS3_01370                                                                                                                                                               |
| Heat-like repeat                           | MS3_08696.1, MS3_01642.1, MS3_09658.1, MS3_10590.1, MS3_05814.1, MS3_02928.1, MS3_06293.1                                                                                            |
| Calponin homology (CH) domain              | MS3_07481.1, MS3_05505.1, MS3_01744.1, MS3_00852.1, MS3_00361.1, MS3_03766.1, MS3_10701.1                                                                                            |
| Dynein light chain type 1                  | MS3_05351.1, MS3_08569.1, MS3_05345.1, MS3_01173.1, MS3_05342.1, MS3_04412.1, MS3_05960.1                                                                                            |
| Actin                                      | MS3_07374.1, MS3_04014.1, MS3_00351.1, MS3_02465.1, MS3_04907.1, MS3_01922.1                                                                                                         |
| HSP-70 protein                             | MS3_10713.1, MS3_11293.1, MS3_11411.1, MS3_10049.1, MS3_02688.1, MS3_02787.1                                                                                                         |

|                                                       |                                                                 |
|-------------------------------------------------------|-----------------------------------------------------------------|
| Immunoglobulin domain                                 | MS3_03027.1, MS3_01271.1, MS3_03208.1, MS3_07594.1, MS3_01223.1 |
| Annexin                                               | MS3_08725.1, MS3_08723.1, MS3_04598.1, MS3_01964.1, MS3_01952.1 |
| AAA domain                                            | MS3_03802.1, MS3_02581.1, MS3_01139.1, MS3_01650.1, MS3_07031.1 |
| 14-3-3 protein                                        | MS3_03977.1, MS3_05219.1, MS3_00047.1, MS3_01871.1, MS3_03976.1 |
| <b><i>120k and 15k vesicles</i></b>                   |                                                                 |
| Tetraspanins                                          | MS3_09198, <i>Sh</i> -TSP-2, MS3_05226, MS3_05289, MS3_01153    |
| Ferritin-like domain                                  | MS3_07972.1, MS3_07178.1                                        |
| 14-3-3 protein                                        | MS3_03977.1, MS3_00047.1                                        |
| Elongation factor Tu C-terminal domain                | MS3_08479.1                                                     |
| EF hand                                               | MS3_08446.1                                                     |
| Actin                                                 | MS3_07374.1                                                     |
| GST, N-terminal domain                                | MS3_06482.1                                                     |
| Cytosol aminopeptidase family, catalytic domain       | MS3_08450.1                                                     |
| Lipocalin/cytosolic fatty-acid binding protein family | MS3_04307.1                                                     |
| Immunoglobulin domain                                 | MS3_03208.1                                                     |
| Saprosin-like type B, region 2                        | MS3_02805.1                                                     |
| Enolase, N-terminal domain                            | MS3_02425.1                                                     |

398 \*proteins listed are members of protein families typically found in helminth EVs.

### 399 3.3 Protein families present in *Schistosoma haematobium* 120k and 15k pellet vesicles

400 Identified proteins were subjected to a Pfam analysis using default parameters in  
401 HMMER v3.1b1 and proteins containing an identified Pfam domain with an E-value <  
402 1E-05 were selected. A total of 70 and 387 domains were identified from 120k and 15k  
403 pellet vesicles, respectively. In 120k pellet vesicles, the three most abundant domains  
404 were proteasome subunit domains (PF00227) (14%), TSP family domains (PF00335)  
405 (7%) and ferritin-like domains (PF12902) (4%) (Fig. 2A). The most abundant protein  
406 domains from 15k pellet vesicles were EF-hand domains (PF00036) (3%), Ras family  
407 domains (PF00071) (3%), TCP-1/cpn60 chaperonin family domains (PF00118) (2%) and  
408 TSP family domains (PF00335) (2%) (Fig. 2B). From these, TSP family domains,  
409 ferritin-like domains and 14-3-3 protein domains were common to both types of vesicles.  
410

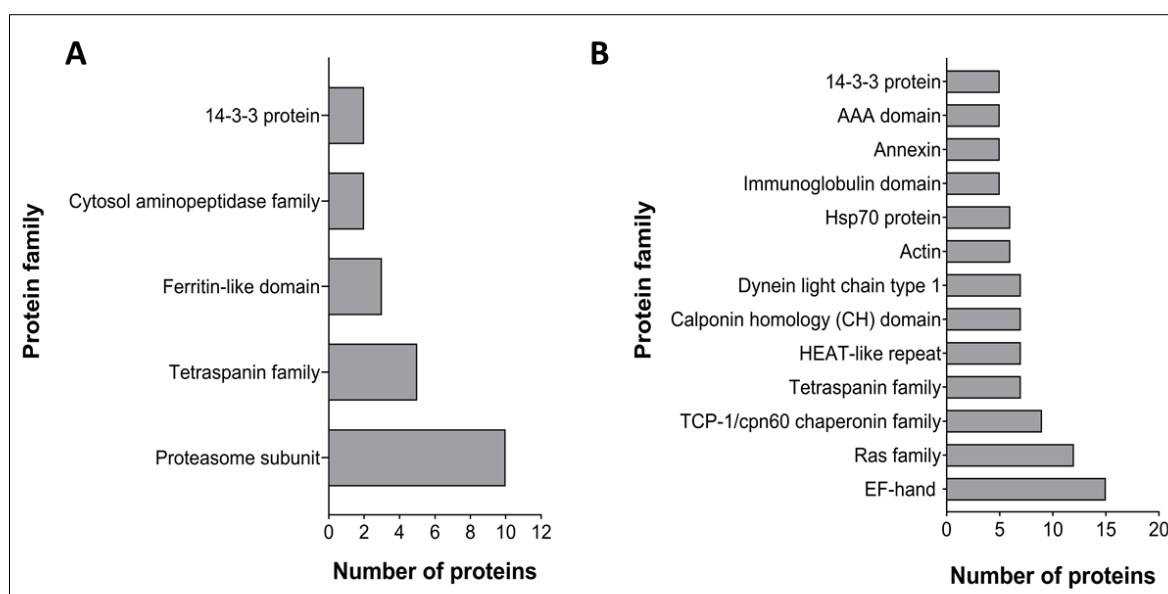

411 **Figure 2.** Pfam analysis of the most abundant *Schistosoma haematobium* vesicle proteins.  
412 The X-axis represents the number of proteins containing at least one of those domains.  
413 (A) 120k pellet vesicles (B) 15k pellet vesicles.

414

415

416

417 *3.4 Gene ontology of proteins identified from Schistosoma haematobium 120k and 15k*  
418 *pellet vesicles*

419       The proteins of adult *S. haematobium* 120k and 15k pellet vesicles were annotated  
420 using Blast2GO [241]. To avoid redundancy in the analysis and better comprehend the  
421 represented GO terms in the vesicles, the parental GO terms were removed and children  
422 GO terms were visualised using ReviGO based on semantic similarity-based scatterplots  
423 [242]. The GO terms were ranked by the nodescore provided by Blast2GO and plotted  
424 using their nodescore and frequency. Semantically similar GO terms plot close together  
425 and increasing heatmap score signifies increasing nodescore from Blast2GO. The circle  
426 size denotes the frequency of the GO term from the underlying database. In 120k pellet  
427 vesicles, several biological processes were highly represented, such as the ubiquitin-  
428 dependent protein catabolic process, oxidation-reduction process and gluconeogenesis  
429 and glycolytic process (Fig. 3A). Similarly, in 15k pellet vesicles, several biological  
430 processes were highly represented, such as the carbohydrate metabolic process, transport  
431 process, organonitrogen compound metabolic process and microtubule-based process  
432 (Fig. 3B). The oxidation-reduction process was common to both types of vesicles; 6  
433 proteins from 120k pellet vesicles and 22 proteins from 15k pellet vesicles were predicted  
434 to be involved in this process.

435       In *S. haematobium* 120k vesicles, several molecular functions were highly  
436 represented, such as threonine-type endopeptidase activity, protein binding activity,  
437 endopeptidase activity and transition metal ion binding activity. In 15k vesicles,  
438 molecular functions such as protein binding activity, ATP binding activity, nucleoside-  
439 triphosphatase activity and calcium ion binding activity were highly represented. From  
440 these highly represented molecular function terms, protein binding was common to both  
441 120k and 15k vesicles.

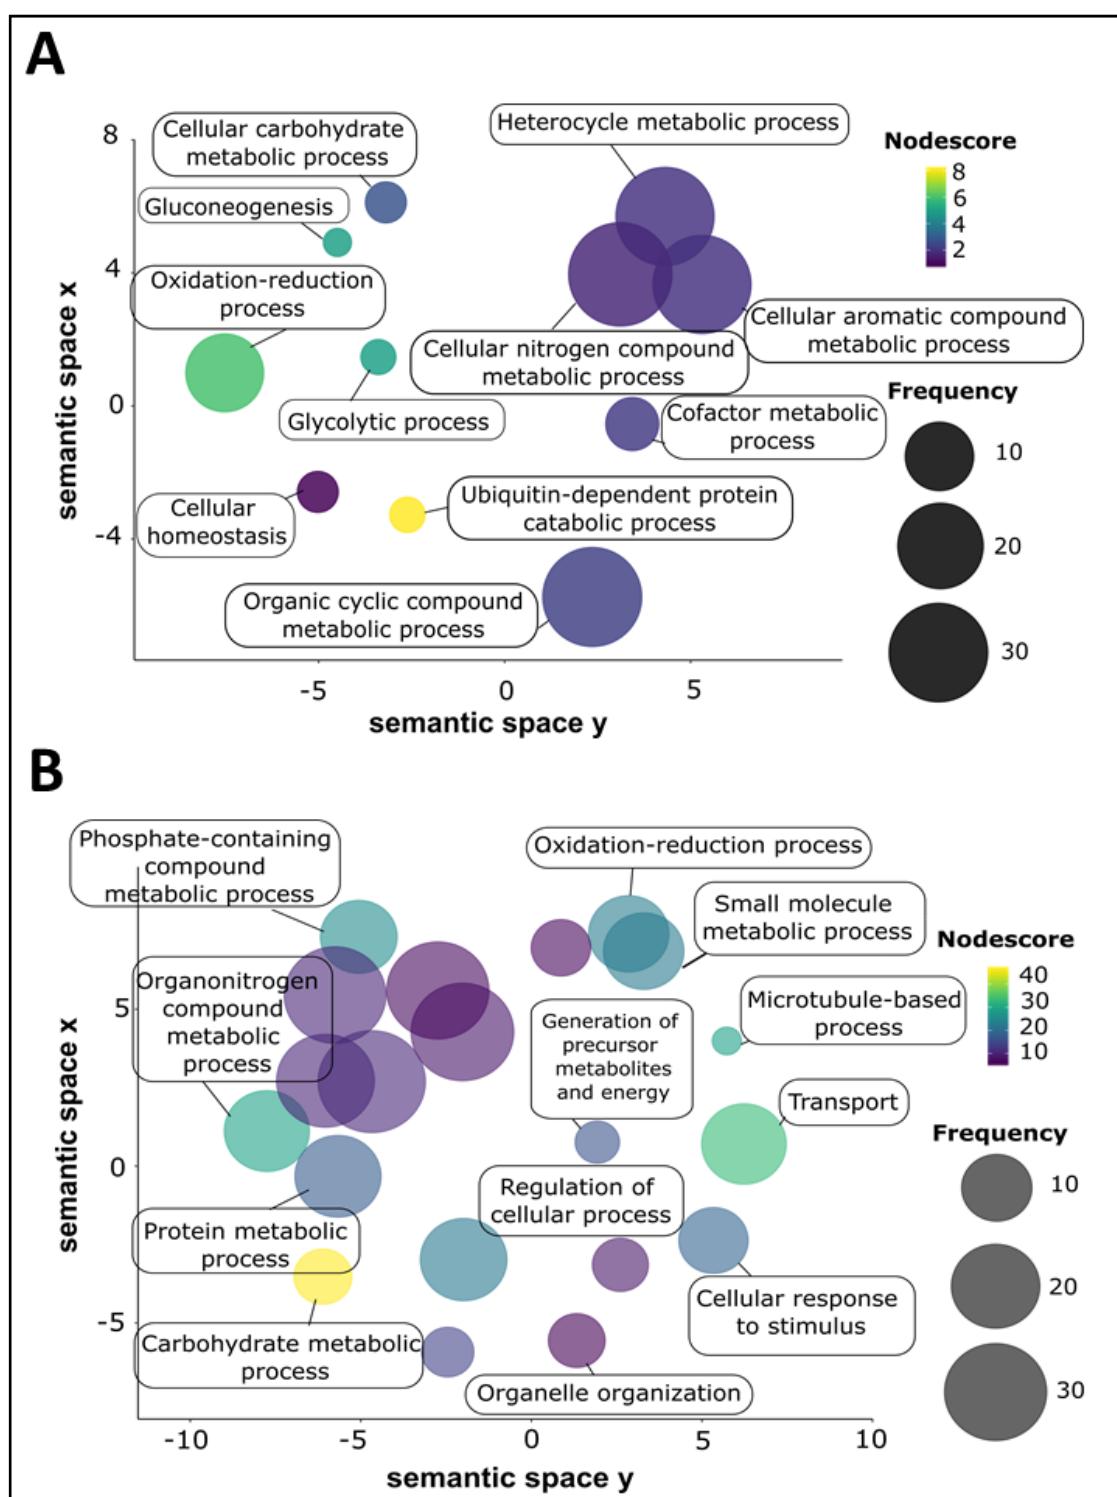

442 **Figure 3.** Biological process GO term categories of adult *Schistosoma haematobium*  
 443 vesicle proteins. Biological processes were ranked by nodescore (Blast2GO) and plotted  
 444 using REViGO. Semantically similar GO terms plot close together, increasing heatmap  
 445 score signifies increasing nodescore from Blast2GO, while circle size denotes the  
 446 frequency of the GO term from the underlying database. (A) 120k pellet vesicles (B) 15k  
 447 pellet vesicles.

448

449

450 *3.5 Parasite burdens in vaccinated and control mice*

451 Vaccination of mice with MS3\_01370, MS3\_09198 showed a trend towards  
452 reduced adult *S. mansoni* burden in trial 1 by 22% and 12%, respectively, and in trial 2  
453 by 14% and 5%, respectively, compared to controls. *Sh*-TSP2-vaccinated mice showed a  
454 reduction in trial 1 only of 2%, compared to controls. None of these differences were  
455 statistically significant except for MS3\_01370 in trial 1 ( $P<0.05$ ) (Fig. 4A and B).  
456 However, in trial 1, vaccination of mice with MS3\_01370, MS3\_09198 and *Sh*-TSP-2  
457 significantly reduced liver egg burdens by 39% ( $P<0.05$ ), 49% ( $P<0.001$ ) and 32%  
458 ( $P<0.01$ ), respectively (Fig. 4C), and in trial 2, MS3\_01370, MS3\_09198 and *Sh*-TSP-2  
459 vaccination significantly reduced liver egg burdens by 54% ( $P<0.001$ ), 27% ( $P<0.05$ ) and  
460 49% ( $P<0.001$ ), respectively (Fig. 4D). Similarly, immunisation of mice with  
461 MS3\_01370, MS3\_09198 and *Sh*-TSP-2 reduced the intestinal egg burden by 57%  
462 ( $P<0.01$ ), 51% ( $P<0.01$ ) and 54% ( $P<0.001$ ) in trial 1, respectively (Fig. 4E), and in trial  
463 2, MS3\_01370, MS3\_09198 and *Sh*-TSP-2 vaccination reduced the intestinal egg burden  
464 by 36% ( $P<0.01$ ), 39% ( $P<0.05$ ) and 27% ( $P<0.05$ ), respectively (Fig. 4.2F).



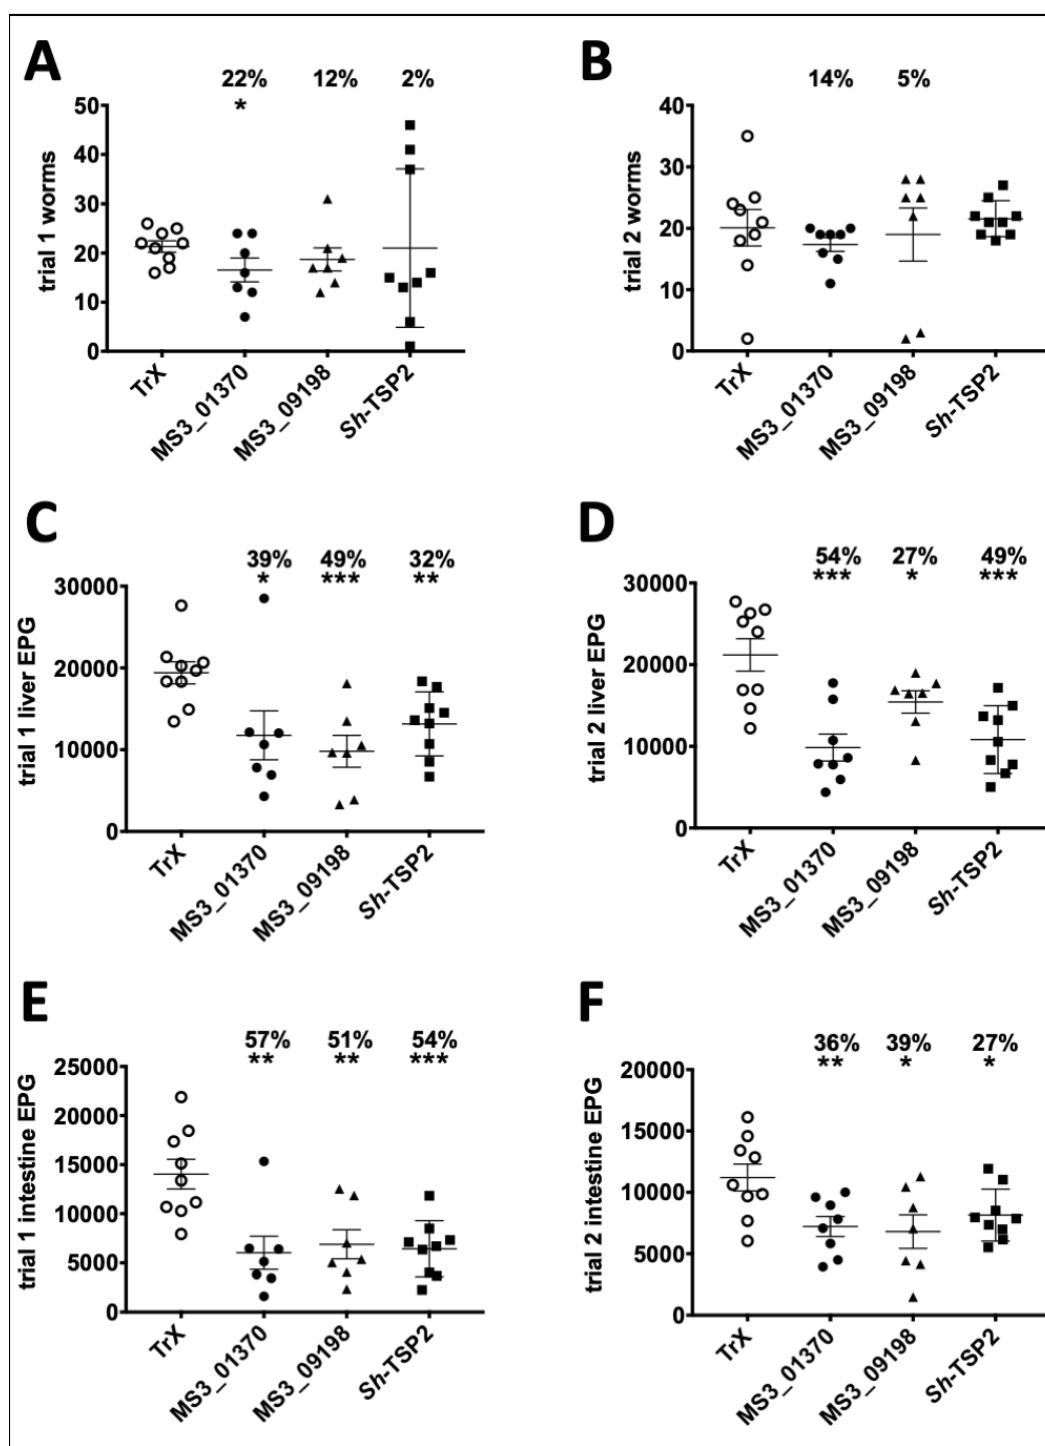

465

466 **Figure 4.** *Schistosoma mansoni* worm and egg burden reduction of vaccinated and control  
 467 mice vaccinated with *S. haematobium* recombinant tetraspanins. (A) Adult worm  
 468 reduction trial 1, (B) Adult worm reduction trial 2, (C) liver egg reduction trial 1, (D)  
 469 liver egg reduction trial 2, (E) intestinal egg reduction trial 1, (F) intestinal egg reduction  
 470 trial 2. Percent reductions in parasite burden are above each dataset. Differences between  
 471 each vaccinated group and the control group were analysed with a student's t-test. \*  
 472  $P < 0.05$ , \*\* $P < 0.01$ , \*\*\*  $P < 0.001$ .

473

#### 474 **4. Discussion**

475 More than 100 million people are infected with *S. haematobium* and 150,000  
476 people die every year [4]. Efforts have been made to reduce the prevalence of  
477 schistosomiasis but the parasite is spreading to new areas [3] and is now the second most  
478 prevalent of the neglected tropical diseases [63]. Praziquantel is the only drug available  
479 for schistosomiasis treatment, although it doesn't protect against re-infection and the risk  
480 of resistance emerging in the field is high [64,65]. Furthermore, there is no licensed and  
481 effective vaccine for this devastating disease, and there is an urgent need to develop one  
482 to eliminate urogenital schistosomiasis as well as the other species of schistosomes.

483 We have shown that *S. haematobium* secretes at least two populations of vesicles  
484 with distinct differences in size and proteomic composition, similar to other schistosome  
485 species like *S. mansoni* [20]. The most represented domains contained within 120k pellet  
486 vesicle proteins were the proteasome subunit domains, TSP domains and ferritin-like  
487 domains, among others, while the most represented domains in the 15k pellet vesicles  
488 were EF-hand, Ras family, TCP-1/cpn60 chaperonin family and TSP family domains.  
489 The proteasome is involved in the biogenesis of EVs [66] and also controls protein  
490 homeostasis and degradation of damaged proteins [67]. Furthermore, in schistosomes, the  
491 proteasome plays an important role in the cellular stress response and survival of the  
492 parasite [68]; it has been shown that treating mice with a proteasome inhibitor prior to  
493 infection with *S. mansoni* cercariae significantly impaired parasite development [69] and  
494 *in vitro* treatment of schistosomula with siRNAs targeting a deubiquitinase subunit of the  
495 19S regulatory particle significantly reduced parasite viability [70].

496 Ferritins are iron-storage proteins, involved in maintaining intracellular iron  
497 balance [71], which minimize free-radical reactions and prevent cellular damage caused  
498 by iron accumulation in the cell [72]. Iron also plays an important role in the eggshell

499 formation of schistosomes, and fer-1, one of the two ferritin isoforms of the parasite, is  
500 highly expressed in female worms in comparison to males [73]. Since, female worms  
501 produce many eggs per day and eggs are the primary cause of pathology, vaccination  
502 using ferritins could disrupt the formation of eggs and reduce egg-induced disease.  
503 Indeed, ferritins have been tested as vaccine candidates against schistosomes;  
504 immunisation of mice with the recombinant Fer-1 of *S. japonicum* caused 35.5% and  
505 52.1% reduction in adult worm and liver egg burden, respectively [74]. Ferritins have been  
506 identified in the proteomic analysis of other blood feeding helminth EVs [20,27],  
507 suggesting a role for EVs in iron storage and acquisition.

508 Proteins containing EF-hand domains are involved in a number of protein-protein  
509 interactions for the uptake and release of calcium [75]. The influx of calcium in the cell  
510 induces the redistribution of phospholipids in the cell membrane, resulting in increased  
511 release of microvesicles [76]. EF-hand domains are also among the most predominant  
512 protein domains found within other helminth EV proteins [77]. This is consistent with the  
513 GO analysis herein, in which proteins involved in protein binding and calcium ion binding  
514 are the highest represented molecular function terms.

515 Ras proteins serve as signalling nodes activated in response to diverse  
516 extracellular stimuli [78] and are involved in biogenesis and release of microvesicles [79].  
517 In *S. mansoni*, Ras proteins are involved in the male-directed maturation of the female  
518 worms [80], which could suggest a potential role of EVs in parasite-parasite  
519 communication.

520 TCP-1/cpn60 chaperonin family proteins play an important role in the folding of  
521 proteins, including actin and tubulin [81], which bind and hydrolyse ATP using  
522 magnesium ions [82]. This is consistent with the molecular function GO terms, in which  
523 ATP binding and nucleoside-triphosphatase was the most represented.

524           The second and fourth most abundant protein domains in 120k and 15k pellet  
525 vesicles, respectively, were the TSPs. TSPs are involved in EV biogenesis [79], are present  
526 on the surface membrane of EVs from many different organisms and are considered a  
527 molecular marker of EVs [83]. TSPs are also found from the proteomic analysis of other  
528 helminth EVs (reviewed in [77]). In trematodes, TSPs are involved in tegument  
529 development [84-86]. TSP LELs have been tested as vaccine candidates in trematode  
530 models of infection [42,47,87] and antibodies produced against TSP vaccine candidates  
531 present in *S. mansoni* and *O. viverrini* EVs blocked the internalisation of EVs by host  
532 cells in both parasites, and decreased pathogenesis in the case of *O. viverrine* [29,42,88],  
533 suggesting a possible mechanism of vaccine efficacy.

534           Since we identified TSPs in both types of vesicles described in this study and there  
535 is evidence that these molecules orchestrate interactions between parasite EVs and host  
536 tissues, we aimed to assess the vaccine efficacy of some of the most abundant EV TSPs  
537 in a challenge model of schistosome infection. Difficulties in generating the large amount  
538 of cercariae needed for mouse infection (the use of hamsters is prohibited in Australia)  
539 precluded the use of *S. haematobium* as the challenge parasite and so we used an *S.*  
540 *mansoni* challenge model instead. Although this meant that a heterologous infection  
541 model would be employed to assess the efficacy of *S. haematobium* proteins, we reasoned  
542 that the homology of the candidates between the two species could be sufficiently high  
543 (*Sh*-TSP2 – 69.6% identity, MS3\_09198 – 98.6% identity and MS3\_01370 – 79.5%  
544 identity) (Figure S1) as to afford a level of cross-species protection and provide  
545 informative data with regards to the vaccine efficacy of these candidates.

546           Vaccination with any of the TSPs did not elicit significant reductions in worm  
547 burden compared to controls (except for MS3\_01370 in trial 1), however, significant  
548 reductions in tissue egg burdens (both liver and intestinal) were observed in all groups of

549 vaccinated mice in both trials. Decreases in tissue egg loads are arguably the most  
550 important hallmarks of an effective vaccine against schistosomiasis given that (1)  
551 pathology due to the disease is egg-induced [89] and (2) disease transmission is dependent  
552 on the excretion of eggs from the host into the environment [10], so a vaccine which  
553 reduces egg burden in the host would ameliorate both disease pathology and transmission.

554         Other schistosome antigens have been reported to elicit a primarily anti-fecundity  
555 protective effect upon vaccination. Glutathione-S-transferases (GSTs) from *S. japonicum*,  
556 *S. haematobium* and the bovine schistosome *S. bovis* have all been reported to induce  
557 decreases in tissue egg loads, despite no observable reduction in worm burden [90-92].  
558 Interestingly, GSTs have been prominently identified from the vesicles in this study and  
559 other proteomic analyses of schistosome EVs [20,27,28]. This manifestation of protective  
560 immunity is seen in cattle which have had repeated field and laboratory exposure to *S.*  
561 *bovis* [93,94] and the closely-related *S. matheei* [95], in Rhesus monkeys experimentally  
562 infected with *S. mansoni* [96], and in baboons following laboratory exposure to *S.*  
563 *haematobium* [97]. In the cattle/*S. bovis* and baboon/*S. haematobium* models, this  
564 observation was confirmed by surgically transplanting “suppressed” worms into hosts  
565 with no prior exposure and showing that the parasites resumed high levels of egg  
566 production [91,97]. It could be that vaccination with the EV molecules described herein is  
567 eliciting similar immune mechanisms to engender the observed anti-fecundity effects,  
568 which may be manifesting in a reduction of the fitness and fecundity of adult worms  
569 and/or a shortening of the lifespan of eggs embolised in the tissues [91]. Further, the ability  
570 of antibodies against helminth EV proteins to block vesicle uptake, which has subsequent  
571 impacts on host cell immune effector mechanisms [20,98], provides a plausible mechanism  
572 for protective efficacy.

573 In this study we provide the first characterisation of EVs secreted by *S.*  
574 *haematobium*, their expression as vaccine candidates present on the surface of these EVs  
575 and the evaluation of these candidates in a heterologous challenge model of  
576 schistosomiasis. The significant reduction in tissue egg burden described here indicates  
577 that these EV-derived vaccine candidates could be effective in reducing the pathology  
578 and transmission of *S. mansoni* and *S. haematobium* (due to the cross-protective efficacy  
579 observed in the heterologous vaccine/challenge model herein) and they could potentially  
580 be incorporated into a pan-schistosome vaccine, due to the geographical overlap between  
581 the two species.

582

### 583 **Acknowledgments**

584 We thank Atik Susianto for maintenance of experimental mice and snails. We also  
585 thank the Biomedical Research Institute, Rockville, MD, USA, especially Dr. Margaret  
586 Mentink-Kane for provision of infected snails. This work was supported by a program  
587 grant from the National Health and Medical Research Council (NHMRC, APP1132975)  
588 and a Senior Principal Research fellowship from NHMRC to AL (APP1117504). GGM  
589 was supported by an AITHM postgraduate research fellowship. The funders had no role  
590 in the study design, data collection and analysis, decision to publish or preparation of the  
591 manuscript. The authors declare no competing financial interests.

592

### 593 **References**

- 594 1. McManus, D.P.; Dunne, D.W.; Sacko, M.; Utzinger, J.; Vennervald, B.J.; Zhou,  
595 X.N. Schistosomiasis. *Nature Review Disease Primers* **2018**, *4*, 13,  
596 doi:10.1038/s41572-018-0013-8.

- 597 2. Chitsulo, L.; Engels, D.; Montresor, A.; Savioli, L. The global status of  
598 schistosomiasis and its control. *Acta Tropica* **2000**, *77*, 41-51, doi:10.1016/s0001-  
599 706x(00)00122-4.
- 600 3. Boissier, J.; Grech-Angelini, S.; Webster, B.L.; Allienne, J.-F.; Huyse, T.; Mas-  
601 Coma, S.; Toulza, E.; Barré-Cardi, H.; Rollinson, D.; Kincaid-Smith, J., et al.  
602 Outbreak of urogenital schistosomiasis in Corsica (France): an epidemiological  
603 case study. *The Lancet Infectious Diseases* **2016**, *16*, 971-979,  
604 doi:10.1016/S1473-3099(16)00175-4.
- 605 4. Berger, S. *Schistosoma haematobium 2017 edition*; GIDEON Informatics Inc:  
606 Los Angeles, CA, **2017**.
- 607 5. World Health Organization. Schistosomiasis: number of people treated worldwide  
608 in 2014. *Weekly Epidemiological Record* **2016**, *91*, 53-60.
- 609 6. Berry, A.; Moné, H.; Iriart, X.; Mouahid, G.; Aboo, O.; Boissier, J.; Fillaux, J.;  
610 Cassaing, S.; Debuissou, C.; Valentin, A., et al. *Schistosomiasis haematobium*,  
611 Corsica, France. *Emerging Infectious Diseases* **2014**, *20*, 1595-1597,  
612 doi:10.3209/eid2009.140756.
- 613 7. Wang, W.; Wang, L.; Liang, Y.S. Susceptibility or resistance of praziquantel in  
614 human schistosomiasis: a review. *Parasitology Research* **2012**, *111*, 1871-1877,  
615 doi:10.1007/s00436-012-3151-z.
- 616 8. Vale, N.; Gouveia, M.J.; Rinaldi, G.; Brindley, P.J.; Gartner, F.; Correia da Costa,  
617 J.M. Praziquantel for Schistosomiasis: Single-Drug Metabolism Revisited, Mode  
618 of Action, and Resistance. *Antimicrobial Agents and Chemotherapy* **2017**, *61*,  
619 doi:10.1128/AAC.02582-16.

- 620 9. Gönnert, R.; Andrews, P. Praziquantel, a new broad-spectrum antischistosomal  
621 agent. *Zeitschrift für Parasitenkunde* **1977**, *52*, 129-150,  
622 doi:10.1007/bf00389899.
- 623 10. McManus, D.P.; Bergquist, R.; Cai, P.; Ranasinghe, S.; Tebeje, B.M.; You, H.  
624 Schistosomiasis-from immunopathology to vaccines. *Seminars in*  
625 *Immunopathology* **2020**, 10.1007/s00281-020-00789-x, doi:10.1007/s00281-020-  
626 00789-x.
- 627 11. Wilson, R.A.; Coulson, P.S. Why don't we have a schistosomiasis vaccine?  
628 *Parasitology Today* **1998**, *14*, 97-99, doi:10.1016/S0169-4758(97)01198-8.
- 629 12. Tebeje, B.M.; Harvie, M.; You, H.; Loukas, A.; McManus, D.P. Schistosomiasis  
630 vaccines: where do we stand? *Parasites and Vectors* **2016**, *9*, 1-15,  
631 doi:10.1186/s13071-016-1799-4.
- 632 13. Riveau, G.; Schacht, A.M.; Dompnier, J.P.; Deplanque, D.; Seck, M.; Waucquier,  
633 N.; Senghor, S.; Delcroix-Genete, D.; Hermann, E.; Idris-Khodja, N., et al. Safety  
634 and efficacy of the rSh28GST urinary schistosomiasis vaccine: A phase 3  
635 randomized, controlled trial in Senegalese children. *PLoS Neglected Tropical*  
636 *Diseases* **2018**, *12*, e0006968, doi:10.1371/journal.pntd.0006968.
- 637 14. Crowe, J.; Lumb, F.E.; Harnett, M.M.; Harnett, W. Parasite excretory-secretory  
638 products and their effects on metabolic syndrome. *Parasite Immunology* **2017**, *39*,  
639 e12410, doi:10.1111/pim.12410.
- 640 15. Delcroix, M.; Medzihradsky, K.; Caffrey, C.R.; Fetter, R.D.; McKerrow, J.H.  
641 Proteomic analysis of adult *S. mansoni* gut contents. *Molecular and Biochemical*  
642 *Parasitology* **2007**, *154*, 95-97, doi:10.1016/j.molbiopara.2007.03.008.
- 643 16. Hall, S.L.; Braschi, S.; Truscott, M.; Mathieson, W.; Cesari, I.M.; Wilson, R.A.  
644 Insights into blood feeding by schistosomes from a proteomic analysis of worm



- 645 vomitus. *Molecular and Biochemical Parasitology* **2011**, *179*, 18-29,  
646 doi:10.1016/j.molbiopara.2011.05.002.
- 647 17. Liu, F.; Cui, S.-J.; Hu, W.; Feng, Z.; Wang, Z.-Q.; Han, Z.-G. Excretory/secretory  
648 proteome of the adult developmental stage of human blood fluke, *Schistosoma*  
649 *japonicum*. *Molecular and Cellular Proteomics* **2009**, *8*, 1236-1251,  
650 doi:10.1074/mcp.M800538-MCP200.
- 651 18. Sotillo, J.; Pearson, M.S.; Becker, L.; Mekonnen, G.G.; Amoah, A.S.; van Dam,  
652 G.; Corstjens, P.L.A.M.; Murray, J.; Mduluz, T.; Mutapi, F., et al. In-depth  
653 proteomic characterization of *Schistosoma haematobium*: Towards the  
654 development of new tools for elimination. *PloS Neglected Tropical Diseases*  
655 **2019**, *13*, e0007362, doi:10.1371/journal.pntd.0007362.
- 656 19. Eichenberger, R.M.; Sotillo, J.; Loukas, A. Immunobiology of parasitic worm  
657 extracellular vesicles. *Immunology and Cell Biology* **2018**, *96*, 704-713,  
658 doi:10.1111/imcb.12171.
- 659 20. Kifle, D.W.; Pearson, M.S.; Becker, L.; Pickering, D.; Loukas, A.; Sotillo, J.  
660 Proteomic analysis of two populations of *Schistosoma mansoni*-derived  
661 extracellular vesicles: 15k pellet and 120k pellet vesicles. *Molecular and*  
662 *Biochemical Parasitology* **2020**, *236*, 111264,  
663 doi:10.1016/j.molbiopara.2020.111264.
- 664 21. Mekonnen, G.G.; Pearson, M.; Loukas, A.; Sotillo, J. Extracellular vesicles from  
665 parasitic helminths and their potential utility as vaccines. *Expert Review of*  
666 *Vaccines* **2018**, *17*, 1-9, doi:10.1080/14760584.2018.1431125.
- 667 22. Kifle, D.W.; Sotillo, J.; Pearson, M.S.; Loukas, A. Extracellular vesicles as a  
668 target for the development of anti-helminth vaccines. *Emerging Topics in Life*  
669 *Sciences* **2017**, *1*, 659-665, doi:10.1042/ETLS20170095.

- 670 23. Kim, K.M.; Abdelmohsen, K.; Mustapic, M.; Kapogiannis, D.; Gorospe, M. RNA  
671 in extracellular vesicles. *Wiley Interdisciplinary reviews: RNA* **2017**, *8*, 1757-  
672 7012 doi:10.1002/wrna.1413.
- 673 24. Pathan, M.; Fonseka, P.; Chitti, S.V.; Kang, T.; Sanwlan, R.; Van Deun, J.;  
674 Hendrix, A.; Mathivanan, S. Vesiclepedia 2019: a compendium of RNA, proteins,  
675 lipids and metabolites in extracellular vesicles. *Nucleic Acids Research* **2019**, *47*,  
676 D516-D519, doi:10.1093/nar/gky1029.
- 677 25. Coakley, G.; Maizels, R.M.; Buck, A.H. Exosomes and Other Extracellular  
678 Vesicles: The New Communicators in Parasite Infections. *Trends in Parasitology*  
679 **2015**, *31*, 477-489, doi:10.1016/j.pt.2015.06.009.
- 680 26. Tritten, L.; Geary, T.G. Helminth extracellular vesicles in host-parasite  
681 interactions. *Current Opinion in Microbiology* **2018**, *46*, 73-79,  
682 doi:10.1016/j.mib.2018.08.002.
- 683 27. Sotillo, J.; Pearson, M.; Potriquet, J.; Becker, L.; Pickering, D.; Mulvenna, J.;  
684 Loukas, A. Extracellular vesicles secreted by *Schistosoma mansoni* contain  
685 protein vaccine candidates. *International Journal for Parasitology* **2016**, *46*, 1-5,  
686 doi:10.1016/j.ijpara.2015.09.002.
- 687 28. Nowacki, F.C.; Swain, M.T.; Klychnikov, O.I.; Niazi, U.; Ivens, A.; Quintana,  
688 J.F.; Hensbergen, P.J.; Hokke, C.H.; Buck, A.H.; Hoffmann, K.F. Protein and  
689 small non-coding RNA-enriched extracellular vesicles are released by the  
690 pathogenic blood fluke *Schistosoma mansoni*. *Journal of Extracellular Vesicles*  
691 **2015**, *4*, 1-16, doi:10.3402/jev.v4.28665.
- 692 29. Chaiyadet, S.; Sotillo, J.; Smout, M.; Cantacessi, C.; Jones, M.K.; Johnson, M.S.;  
693 Turnbull, L.; Whitchurch, C.B.; Potriquet, J.; Laohaviroj, M., et al. Carcinogenic  
694 liver fluke secretes extracellular vesicles that promote cholangiocytes to adopt a

- 695 tumorigenic phenotype. *Journal of Infectious Disease* **2015**, *212*, 1636-1645,  
696 doi:10.1093/infdis/jiv291.
- 697 30. Cwiklinski, K.; de la Torre-Escudero, E.; Trelis, M.; Bernal, D.; Dufresne, P.J.;  
698 Brennan, G.P.; O'Neill, S.; Tort, J.; Paterson, S.; Marcilla, A., et al. The  
699 extracellular vesicles of the helminth pathogen, *Fasciola hepatica*: Biogenesis  
700 pathways and cargo molecules involved in parasite pathogenesis. *Molecular and*  
701 *Cellular proteomics* **2015**, *14*, 3258-3273, doi:10.1074/mcp.M115.053934.
- 702 31. Zhu, L.; Liu, J.; Dao, J.; Lu, K.; Li, H.; Gu, H.; Liu, J.; Feng, X.; Cheng, G.  
703 Molecular characterization of *S. japonicum* exosome-like vesicles reveals their  
704 regulatory roles in parasite-host interactions. *Scientific Reports* **2016**, *6*, 25885,  
705 doi:10.1038/srep25885.
- 706 32. Zheng, Y.; Guo, A.; Guo, X.; Su, M.; Ding, J.; Yang, J.; Xiang, H.; Cao, X.;  
707 Zhang, S.; Ayaz, M., et al. Regulatory effects of *Echinococcus multilocularis*  
708 extracellular vesicles on RAW264.7 macrophages. *Veterinary Parasitology* **2017**,  
709 *235*, 29-36, doi:10.1016/j.vetpar.2017.01.012.
- 710 33. Nicolao, M.C.; Rodriguez Rodrigues, C.; Cumino, A.C. Extracellular vesicles  
711 from *Echinococcus granulosus* larval stage: Isolation, characterization and uptake  
712 by dendritic cells. *PloS Neglected Tropical Diseases* **2019**, *13*, e0007032,  
713 doi:10.1371/journal.pntd.0007032.
- 714 34. Eichenberger, R.M.; Ryan, S.; Jones, L.; Buitrago, G.; Polster, R.; de Oca, M.M.;  
715 Zuvelek, J.; Giacomini, P.R.; Dent, L.A.; Engwerda, C.R., et al. Hookworm  
716 secreted extracellular vesicles interact with host cells and prevent inducible colitis  
717 in mice. *Frontiers in Immunology* **2018**, *9*, 850, doi:10.3389/fimmu.2018.00850.
- 718 35. Eichenberger, R.M.; Talukder, M.H.; Field, M.A.; Wangchuk, P.; Giacomini, P.;  
719 Loukas, A.; Sotillo, J. Characterization of *Trichuris muris* secreted proteins and

- 720 extracellular vesicles provides new insights into host-parasite communication.  
721 *Journal of Extracellular Vesicles* **2018**, *7*, 1428004-1428016,  
722 doi:10.1080/20013078.2018.1428004.
- 723 36. Bernal, D.; Trelis, M.; Montaner, S.; Cantalapiedra, F.; Galiano, A.; Hackenberg,  
724 M.; Marcilla, A. Surface analysis of *Dicrocoelium dendriticum*. The molecular  
725 characterization of exosomes reveals the presence of miRNAs. *Journal of*  
726 *Proteomics* **2014**, *105*, 232, doi:10.1016/j.jprot.2014.02.012.
- 727 37. Buck, A.H.; Coakley, G.; Simbari, F.; McSorley, H.J.; Quintana, J.F.; Le Bihan,  
728 T.; Kumar, S.; Abreu-Goodger, C.; Lear, M.; Marcus, Y., et al. Exosomes secreted  
729 by nematode parasites transfer small RNAs to mammalian cells and modulate  
730 innate immunity. *Nature Communications* **2014**, *5*, 5488,  
731 doi:10.1038/ncomms6488.
- 732 38. Hansen, E.P.; Fromm, B.; Andersen, S.D.; Marcilla, A.; Andersen, K.L.; Borup,  
733 A.; Williams, A.R.; Jex, A.R.; Gasser, R.B.; Young, N.D., et al. Exploration of  
734 extracellular vesicles from *Ascaris suum* provides evidence of parasite-host cross  
735 talk. *Journal of Extracellular Vesicles* **2019**, *8*, 1578116,  
736 doi:10.1080/20013078.2019.1578116.
- 737 39. Wang, L.; Li, Z.; Shen, J.; Liu, Z.; Liang, J.; Wu, X.; Sun, X.; Wu, Z. Exosome-  
738 like vesicles derived by *Schistosoma japonicum* adult worms mediates M1 type  
739 immune- activity of macrophage. *Parasitology Research* **2015**, *114*, 1865-1873,  
740 doi:10.1007/s00436-015-4373-7.
- 741 40. Zamanian, M.; Fraser, L.M.; Agbedanu, P.N.; Harischandra, H.; Moorhead, A.R.;  
742 Day, T.A.; Bartholomay, L.C.; Kimber, M.J. Release of small RNA-containing  
743 exosome-like vesicles from the human filarial parasite *Brugia malayi*. *PloS*

- 744 *Neglected Tropical Diseases* **2015**, 9, e0004069,  
745 doi:10.1371/journal.pntd.0004069.
- 746 41. Shears, R.K.; Bancroft, A.J.; Hughes, G.W.; Grencis, R.K.; Thornton, D.J.  
747 Extracellular vesicles induce protective immunity against *Trichuris muris*.  
748 *Parasite Immunology* **2018**, 40, e12536, doi:10.1111/pim.12536.
- 749 42. Sujittra, C.; Sotillo, J.; Krueajampa, W.; Thongsen, S.; Brindley, P.J.; Sripa, B.;  
750 Loukas, A.; Laha, T. Vaccination of hamsters with *Opisthorchis viverrini*  
751 extracellular vesicles and vesicle-derived recombinant tetraspanins induces  
752 antibodies that block vesicle uptake by cholangiocytes and reduce parasite burden  
753 after challenge infection. *PloS Neglected Tropical Diseases* **2019**, 13, e0007450,  
754 doi:10.1371/journal.pntd.0007450.
- 755 43. Trelis, M.; Galiano, A.; Bolado, A.; Toledo, R.; Marcilla, A.; Bernal, D.  
756 Subcutaneous injection of exosomes reduces symptom severity and mortality  
757 induced by *Echinostoma caproni* infection in BALB/c mice. *International*  
758 *Journal for Parasitology* **2016**, 46, 799-808, doi:10.1016/j.ijpara.2016.07.003.
- 759 44. Coakley, G.; Maizels, R.M.; Buck, A.H. Exosomes and other extracellular  
760 vesicles: The new communicators in parasite infections. *Trends in Parasitology*  
761 **2015**, 31, 477-489, doi:10.1016/j.pt.2015.06.009.
- 762 45. Da'dara, A.A.; Skelly, P.J.; Wang, M.; Harn, D.A. Immunization with plasmid  
763 DNA encoding the integral membrane protein, Sm23, elicits a protective immune  
764 response against schistosome infection in mice. *Vaccine* **2001**, 20, 359-369,  
765 doi:10.1016/S0264-410X(01)00374-7.
- 766 46. Pearson, M.S.; Pickering, D.A.; McSorley, H.J.; Bethony, J.M.; Tribolet, L.;  
767 Dougall, A.M.; Hotez, P.J.; Loukas, A. Enhanced protective efficacy of a chimeric

- 768 form of the schistosomiasis vaccine antigen *Sm-TSP-2*. *PLoS Neglected Tropical*  
769 *Diseases* **2012**, *6*, e1564, doi:10.1371/journal.pntd.0001564.
- 770 47. Tran, M.H.; Pearson, M.S.; Bethony, J.M.; Smyth, D.J.; Jones, M.K.; Duke, M.;  
771 Don, T.A.; McManus, D.P.; Correa-Oliveira, R.; Loukas, A. Tetraspanins on the  
772 surface of *Schistosoma mansoni* are protective antigens against schistosomiasis.  
773 *Nature Medicine* **2006**, *12*, 835-840, doi:10.1038/nm1430.
- 774 48. Keitel, W.A.; Potter, G.E.; Diemert, D.; Bethony, J.; El Sahly, H.M.; Kennedy,  
775 J.K.; Patel, S.M.; Plieskatt, J.L.; Jones, W.; Deye, G., et al. A phase 1 study of the  
776 safety, reactogenicity, and immunogenicity of a *Schistosoma mansoni* vaccine  
777 with or without glucopyranosyl lipid A aqueous formulation (GLA-AF) in healthy  
778 adults from a non-endemic area. *Vaccine* **2019**, *37*, 6500-6509,  
779 doi:10.1016/j.vaccine.2019.08.075.
- 780 49. Yuan, C.; Fu, Y.-j.; Li, J.; Yue, Y.-f.; Cai, L.-l.; Xiao, W.-j.; Chen, J.-p.; Yang, L.  
781 *Schistosoma japonicum*: Efficient and rapid purification of the tetraspanin  
782 extracellular loop 2, a potential protective antigen against schistosomiasis in  
783 mammalian. *Experimental Parasitology* **2010**, *126*, 456-461,  
784 doi:10.1016/j.exppara.2010.05.018.
- 785 50. Tucker, M.S.; Karunaratne, L.B.; Lewis, F.A.; Frietas, T.C.; Liang, Y.-S.  
786 Schistosomiasis. In *Current Protocols in Immunology*, Coico, R., Ed. John Wiley  
787 and Sons, Inc.: 2013; 10.1002/0471142735.im1901s103pp.19.11.11-19.11.57.
- 788 51. Stroehlein, A.J.; Korhonen, P.K.; Chong, T.M.; Lim, Y.L.; Chan, K.G.; Webster,  
789 B.; Rollinson, D.; Brindley, P.J.; Gasser, R.B.; Young, N.D. High-quality  
790 *Schistosoma haematobium* genome achieved by single-molecule and long-range  
791 sequencing. *Gigascience* **2019**, *8*, doi:10.1093/gigascience/giz108.

- 792 52. Young, N.D.; Jex, A.R.; Li, B.; Liu, S.; Yang, L.; Xiong, Z.; Li, Y.; Cantacessi,  
793 C.; Hall, R.S.; Xu, X., et al. Whole-genome sequence of *Schistosoma*  
794 *haematobium*. *Nature Genetics* **2012**, *44*, 221-225, doi:10.1038/ng.1065.
- 795 53. Craig, R.; Cortens, J.P.; Beavis, R.C. Open source system for analyzing,  
796 validating, and storing protein identification data. *Journal of Proteome Research*  
797 **2004**, *3*, 1234-1242, doi:10.1021/pr049882h.
- 798 54. Kim, S.; Pevzner, P.A. MS-GF+ makes progress towards a universal database  
799 search tool for proteomics. *Nature Communications* **2014**, *5*, 5277,  
800 doi:10.1038/ncomms6277.
- 801 55. Diament, B.J.; Noble, W.S. Faster SEQUEST searching for peptide identification  
802 from tandem mass spectra. *Journal of Proteome Research* **2011**, *10*, 3871-3879,  
803 doi:10.1021/pr101196n.
- 804 56. Vaudel, M.; Barsnes, H.; Berven, F.S.; Sickmann, A.; Martens, L. SearchGUI: An  
805 open-source graphical user interface for simultaneous OMSSA and X!Tandem  
806 searches. *Proteomics* **2011**, *11*, 996-999, doi:10.1002/pmic.201000595.
- 807 57. Finn, R.D.; Clements, J.; Eddy, S.R. HMMER web server: interactive sequence  
808 similarity searching. *Nucleic Acids Research* **2011**, *39*, W29-37,  
809 doi:10.1093/nar/gkr367.
- 810 58. Conesa, A.; Gotz, S.; Garcia-Gomez, J.M.; Terol, J.; Talon, M.; Robles, M.  
811 Blast2GO: a universal tool for annotation, visualization and analysis in functional  
812 genomics research. *Bioinformatics* **2005**, *21*, 3674-3676,  
813 doi:10.1093/bioinformatics/bti610.
- 814 59. Supek, F.; Bosnjak, M.; Skunca, N.; Smuc, T. REVIGO summarizes and  
815 visualizes long lists of gene ontology terms. *PLoS One* **2011**, *6*, e21800,  
816 doi:10.1371/journal.pone.0021800.

- 817 60. Sonnhammer, E.L.; von Heijne, G.; Krogh, A. A hidden Markov model for  
818 predicting transmembrane helices in protein sequences. *Proceedings of the*  
819 *International Conference on Intelligent Systems in Molecular Biology* **1998**, *6*,  
820 175-182.
- 821 61. Petersen, T.N.; Brunak, S.; von Heijne, G.; Nielsen, H. SignalP 4.0:  
822 discriminating signal peptides from transmembrane regions. *Nature Methods*  
823 **2011**, *8*, 785-786, doi:10.1038/nmeth.1701.
- 824 62. Tedla, B.A.; Pickering, D.; Becker, L.; Loukas, A.; Pearson, M.S. Vaccination  
825 with *Schistosoma mansoni* Cholinesterases Reduces the Parasite Burden and Egg  
826 Viability in a Mouse Model of Schistosomiasis. *Vaccines (Basel)* **2020**, *8*,  
827 doi:10.3390/vaccines8020162.
- 828 63. WHO. *Fact sheet on neglected tropical diseases. Available at*  
829 <https://www.who.int/en/news-room/fact-sheets/detail/schistosomiasis>. Accessed  
830 on 20 Jan 2019.
- 831 64. Bergquist, R.; Utzinger, J.; Keiser, J. Controlling schistosomiasis with  
832 praziquantel: How much longer without a viable alternative? *Infect Disease and*  
833 *Poverty* **2017**, *6*, 74, doi:10.1186/s40249-017-0286-2.
- 834 65. Cioli, D. Praziquantel: is there real resistance and are there alternatives? *Current*  
835 *Opinion in Infectious Diseases* **2000**, *13*, 659-663, doi:10.1097/00001432-  
836 200012000-00014.
- 837 66. Tucher, C.; Bode, K.; Schiller, P.; Classen, L.; Birr, C.; Souto-Carneiro, M.M.;  
838 Blank, N.; Lorenz, H.M.; Schiller, M. Extracellular Vesicle Subtypes Released  
839 From Activated or Apoptotic T-Lymphocytes Carry a Specific and Stimulus-  
840 Dependent Protein Cargo. *Frontiers in Immunology* **2018**, *9*, 534,  
841 doi:10.3389/fimmu.2018.00534.



- 842 67. Bhattacharyya, S.; Yu, H.; Mim, C.; Matouschek, A. Regulated protein turnover:  
843 snapshots of the proteasome in action. *Nature Reviews Molecular Cell Biology*  
844 **2014**, *15*, 122-133, doi:10.1038/nrm3741.
- 845 68. de Paula, R.G.; de Magalhaes Ornelas, A.M.; Morais, E.R.; de Souza Gomes, M.;  
846 de Paula Aguiar, D.; Magalhaes, L.G.; Rodrigues, V. Proteasome stress responses  
847 in *Schistosoma mansoni*. *Parasitology Research* **2015**, *114*, 1747-1760,  
848 doi:10.1007/s00436-015-4360-z.
- 849 69. Guerra-Sa, R.; Castro-Borges, W.; Evangelista, E.A.; Kettelhut, I.C.; Rodrigues,  
850 V. *Schistosoma mansoni*: functional proteasomes are required for development in  
851 the vertebrate host. *Experimental Parasitology* **2005**, *109*, 228-236,  
852 doi:10.1016/j.exppara.2005.01.002.
- 853 70. Nabhan, J.F.; El-Shehabi, F.; Patocka, N.; Ribeiro, P. The 26S proteasome in  
854 *Schistosoma mansoni*: bioinformatics analysis, developmental expression, and  
855 RNA interference (RNAi) studies. *Experimental Parasitology* **2007**, *117*, 337-  
856 347, doi:10.1016/j.exppara.2007.08.002.
- 857 71. Arosio, P.; Elia, L.; Poli, M. Ferritin, cellular iron storage and regulation. *IUBMB*  
858 *Life* **2017**, *69*, 414-422, doi:10.1002/iub.1621.
- 859 72. Orino, K.; Lehman, L.; Tsuji, Y.; Ayaki, H.; Torti, S.V.; Torti, F.M. Ferritin and  
860 the response to oxidative stress. *Biochemical Journal* **2001**, *357*, 241-247,  
861 doi:10.1042/0264-6021:3570241.
- 862 73. Jones, M.K.; McManus, D.P.; Sivadorai, P.; Glanfield, A.; Moertel, L.; Belli, S.I.;  
863 Gobert, G.N. Tracking the fate of iron in early development of human blood  
864 flukes. *International Journal of Biochemistry and Cell Biology* **2007**, *39*, 1646-  
865 1658, doi:10.1016/j.biocel.2007.04.017.

- 866 74. Chen, L.Y.; Yi, X.Y.; Zeng, X.F.; Zhang, S.K.; McReynolds, L. [Mucosal  
867 immunization of recombinant *Schistosoma japonicum* ferritin]. *Zhongguo Ji*  
868 *Sheng Chong Xue Yu Ji Sheng Chong Bing Za Zhi* **2004**, *22*, 129-132.
- 869 75. Nagamune, K.; Moreno, S.N.; Chini, E.N.; Sibley, L.D. Calcium regulation and  
870 signaling in apicomplexan parasites. *Subcellular Biochemistry* **2008**, *47*, 70-81,  
871 doi:10.1007/978-0-387-78267-6\_5.
- 872 76. Bucki, R.; Bachelot-Loza, C.; Zachowski, A.; Giraud, F.; Sulpice, J.C. Calcium  
873 induces phospholipid redistribution and microvesicle release in human  
874 erythrocyte membranes by independent pathways. *Biochemistry* **1998**, *37*, 15383-  
875 15391, doi:10.1021/bi9805238.
- 876 77. Sotillo, J.; Robnson, M.W.; Kimber, M.J.; Cucher, M.; Ancarola, M.E.; Nesjum,  
877 P.; Marcilla, A.; Eichenberger, R.M.; Tritten, L. The protein and microRNA cargo  
878 of extracellular vesicles from parasitic helminths - current status and research  
879 priorities. *International Journal for Parasitology* **2020**, in press.
- 880 78. Repasky, G.A.; Chenette, E.J.; Der, C.J. Renewing the conspiracy theory debate:  
881 does Raf function alone to mediate Ras oncogenesis? *Trends in Cell Biology* **2004**,  
882 *14*, 639-647, doi:10.1016/j.tcb.2004.09.014.
- 883 79. Abels, E.R.; Breakefield, X.O. Introduction to Extracellular Vesicles: Biogenesis,  
884 RNA Cargo Selection, Content, Release, and Uptake. *Cellular and Molecular*  
885 *Neurobiology* **2016**, *36*, 301-312, doi:10.1007/s10571-016-0366-z.
- 886 80. Schussler, P.; Grevelding, C.G.; Kunz, W. Identification of Ras, MAP kinases,  
887 and a GAP protein in *Schistosoma mansoni* by immunoblotting and their putative  
888 involvement in male-female interaction. *Parasitology* **1997**, *115* ( Pt 6), 629-634,  
889 doi:10.1017/s003118209700173x.

- 890 81. Gomez-Puertas, P.; Martin-Benito, J.; Carrascosa, J.L.; Willison, K.R.; Valpuesta,  
891 J.M. The substrate recognition mechanisms in chaperonins. *Journal of Molecular*  
892 *Recognition* **2004**, *17*, 85-94, doi:10.1002/jmr.654.
- 893 82. Frydman, J.; Nimmesgern, E.; Erdjument-Bromage, H.; Wall, J.S.; Tempst, P.;  
894 Hartl, F.U. Function in protein folding of TRiC, a cytosolic ring complex  
895 containing TCP-1 and structurally related subunits. *EMBO Journal* **1992**, *11*,  
896 4767-4778.
- 897 83. Andreu, Z.; Yanez-Mo, M. Tetraspanins in extracellular vesicle formation and  
898 function. *Frontiers in Immunology* **2014**, *5*, 442, doi:10.3389/fimmu.2014.00442.
- 899 84. Chaiyadet, S.; Krueajampa, W.; Hipkaeo, W.; Plosan, Y.; Piratae, S.; Sotillo, J.;  
900 Smout, M.; Sripa, B.; Brindley, P.J.; Loukas, A., et al. Suppression of mRNAs  
901 encoding CD63 family tetraspanins from the carcinogenic liver fluke *Opisthorchis*  
902 *viverrini* results in distinct tegument phenotypes. *Scientific Reports* **2017**, *7*,  
903 14342, doi:10.1038/s41598-017-13527-5.
- 904 85. Piratae, S.; Tesana, S.; Jones, M.K.; Brindley, P.J.; Loukas, A.; Lovas, E.;  
905 Eursitthichai, V.; Sripa, B.; Thanasuwan, S.; Laha, T. Molecular characterization  
906 of a tetraspanin from the human liver fluke, *Opisthorchis viverrini*. *PLoS*  
907 *Neglected Tropical Diseases* **2012**, *6*, e1939, doi:10.1371/journal.pntd.0001939.
- 908 86. Tran, M.H.; Freitas, T.C.; Cooper, L.; Gaze, S.; Gatton, M.L.; Jones, M.K.; Lovas,  
909 E.; Pearce, E.J.; Loukas, A. Suppression of mRNAs encoding tegument  
910 tetraspanins from *Schistosoma mansoni* results in impaired tegument turnover.  
911 *PLoS Pathogens* **2010**, *6*, e1000840, doi:10.1371/journal.ppat.1000840.
- 912 87. Zhang, W.; Li, J.; Duke, M.; Jones, M.K.; Kuang, L.; Zhang, J.; Blair, D.; Li, Y.;  
913 McManus, D.P. Inconsistent protective efficacy and marked polymorphism limits

- 914 the value of *Schistosoma japonicum* tetraspanin-2 as a vaccine target. *PloS*  
915 *Neglected Tropical Diseases* **2011**, *5*, e1166, doi:10.1371/journal.pntd.0001166.
- 916 88. Kifle, D.W.; Chaiyadet, S.; Waardenberg, A.; Wise, I.; Cooper, M.; Becker, L.;  
917 Doolan, D.; Laha, T.; Javier, S.; Pearson, M.S., et al. Uptake of *Schistosoma*  
918 *mansoni* extracellular vesicles by human endothelial and monocytic cell lines and  
919 impact on vascular endothelial cell gene expression. *International Journal for*  
920 *Parasitology* **2020**, in press.
- 921 89. Burke, M.L.; Jones, M.K.; Gobert, G.N.; Li, Y.S.; Ellis, M.K.; McManus, D.P.  
922 Immunopathogenesis of human schistosomiasis. *Parasite Immunology* **2009**, *31*,  
923 163-176, doi:10.1111/j.1365-3024.2009.01098.x.
- 924 90. Beaumier, C.M.; Gillespie, P.M.; Hotez, P.J.; Bottazzi, M.E. New vaccines for  
925 neglected parasitic diseases and dengue. *Translational Research* **2013**, *162*, 144-  
926 155, doi:10.1016/j.trsl.2013.03.006.
- 927 91. Bushara, H.O.; Bashir, M.E.N.; Malik, K.H.E.; Mukhtar, M.M.; Trottein, F.;  
928 Capron, A.; Taylor, M.G. Suppression of *Schistosoma bovis* egg production in  
929 cattle by vaccination with either glutathione S-transferase or keyhole limpet  
930 haemocyanin. *Parasite Immunology* **1993**, *15*, 383-390, doi:10.1111/j.1365-  
931 3024.1993.tb00623.x.
- 932 92. Mbanefo, E.C.; Kumagai, T.; Kodama, Y.; Kurosaki, T.; Furushima-  
933 Shimogawara, R.; Cherif, M.S.; Mizukami, S.; Kikuchi, M.; Huy, N.T.; Ohta, N.,  
934 et al. Immunogenicity and anti-fecundity effect of nanoparticle coated glutathione  
935 S-transferase (SjGST) DNA vaccine against murine *Schistosoma japonicum*  
936 infection. *Parasitology International* **2015**, *64*, 24-31,  
937 doi:10.1016/j.parint.2015.01.005.

- 938 93. Bushara, H.O.; Majid, A.A.; Saad, A.M.; Hussein, M.F.; Taylor, M.G.; Dargie,  
939 J.D.; Marshall, T.F.; Nelson, G.S. Observations on cattle schistosomiasis in the  
940 Sudan, a study in comparative medicine. II. Experimental demonstration of  
941 naturally acquired resistance to *Schistosoma bovis*. *American Journal of Tropical*  
942 *Medicine and Hygiene* **1980**, *29*, 442-451, doi:10.4269/ajtmh.1980.29.442.
- 943 94. Saad, A.M.; Hussein, M.F.; Dargie, J.D.; Taylor, M.G.; Nelson, G.S. *Schistosoma*  
944 *bovis* in calves: the development and clinical pathology of primary infections.  
945 *Research in Veterinary Science* **1980**, *28*, 105-111.
- 946 95. Massoud, J. Parasitological and pathological observations on *Schistosoma bovis*  
947 Sonsino, 1876, in calves, sheep and goats in Iran. *Journal of Helminthology* **1973**,  
948 *47*, 155-164, doi:10.1017/s0022149x00023853.
- 949 96. Cheever, A.W.; Powers, K.G. *Schistosoma mansoni* infection in rhesus monkeys:  
950 changes in egg production and egg distribution in prolonged infections in intact  
951 and splenectomized monkeys. *Annals of Tropical Medicine and Parasitology*  
952 **1969**, *63*, 83-93, doi:10.1080/00034983.1969.11686603.
- 953 97. Webbe, G.; James, C.; Nelson, G.S.; Smithers, S.R.; Terry, R.J. Acquired  
954 resistance to *Schistosoma haematobium* in the baboon (*Papio anubis*) after  
955 cercarial exposure and adult worm transplantation. *Annals of Tropical Medicine*  
956 *and Parasitology* **1976**, *70*, 411-424, doi:10.1080/00034983.1976.11687140.
- 957 98. Meninger, T.; Barsheshet, Y.; Ofir-Birin, Y.; Gold, D.; Brant, B.; Dekel, E.; Sidi,  
958 Y.; Schwartz, E.; Regev-Rudzki, N.; Avni, O., et al. Schistosomal extracellular  
959 vesicle-enclosed miRNAs modulate host T helper cell differentiation. *EMBO*  
960 *Reports* **2020**, *21*, e47882, doi:10.15252/embr.201947882.

961

962

963 **SUPPLEMENTARY DATA**

964 **Supplementary Table 1.** Density, protein concentration, particle concentration, purity  
965 and size of the 15k pellet vesicle fraction and gradient-separated 120k vesicle pellet  
966 fractions.

967

968 **Supplementary Table 2.** Proteins identified from *Schistosoma haematobium*-derived  
969 15k pellet vesicles.

970

971 **Supplementary Table 3.** Proteins identified from *Schistosoma haematobium*-derived  
972 120k pellet vesicles.

973

974 **Supplementary Figure 1.** Protein alignment of the large extracellular loop from each of  
975 the *Schistosoma haematobium* tetraspanins used in the vaccine trials with their  
976 homologue from *Schistosoma mansoni*. (A) *Sh*-TSP2; (B) MS3\_09198 and (C)  
977 MS3\_01370.

978

979 Figure S1

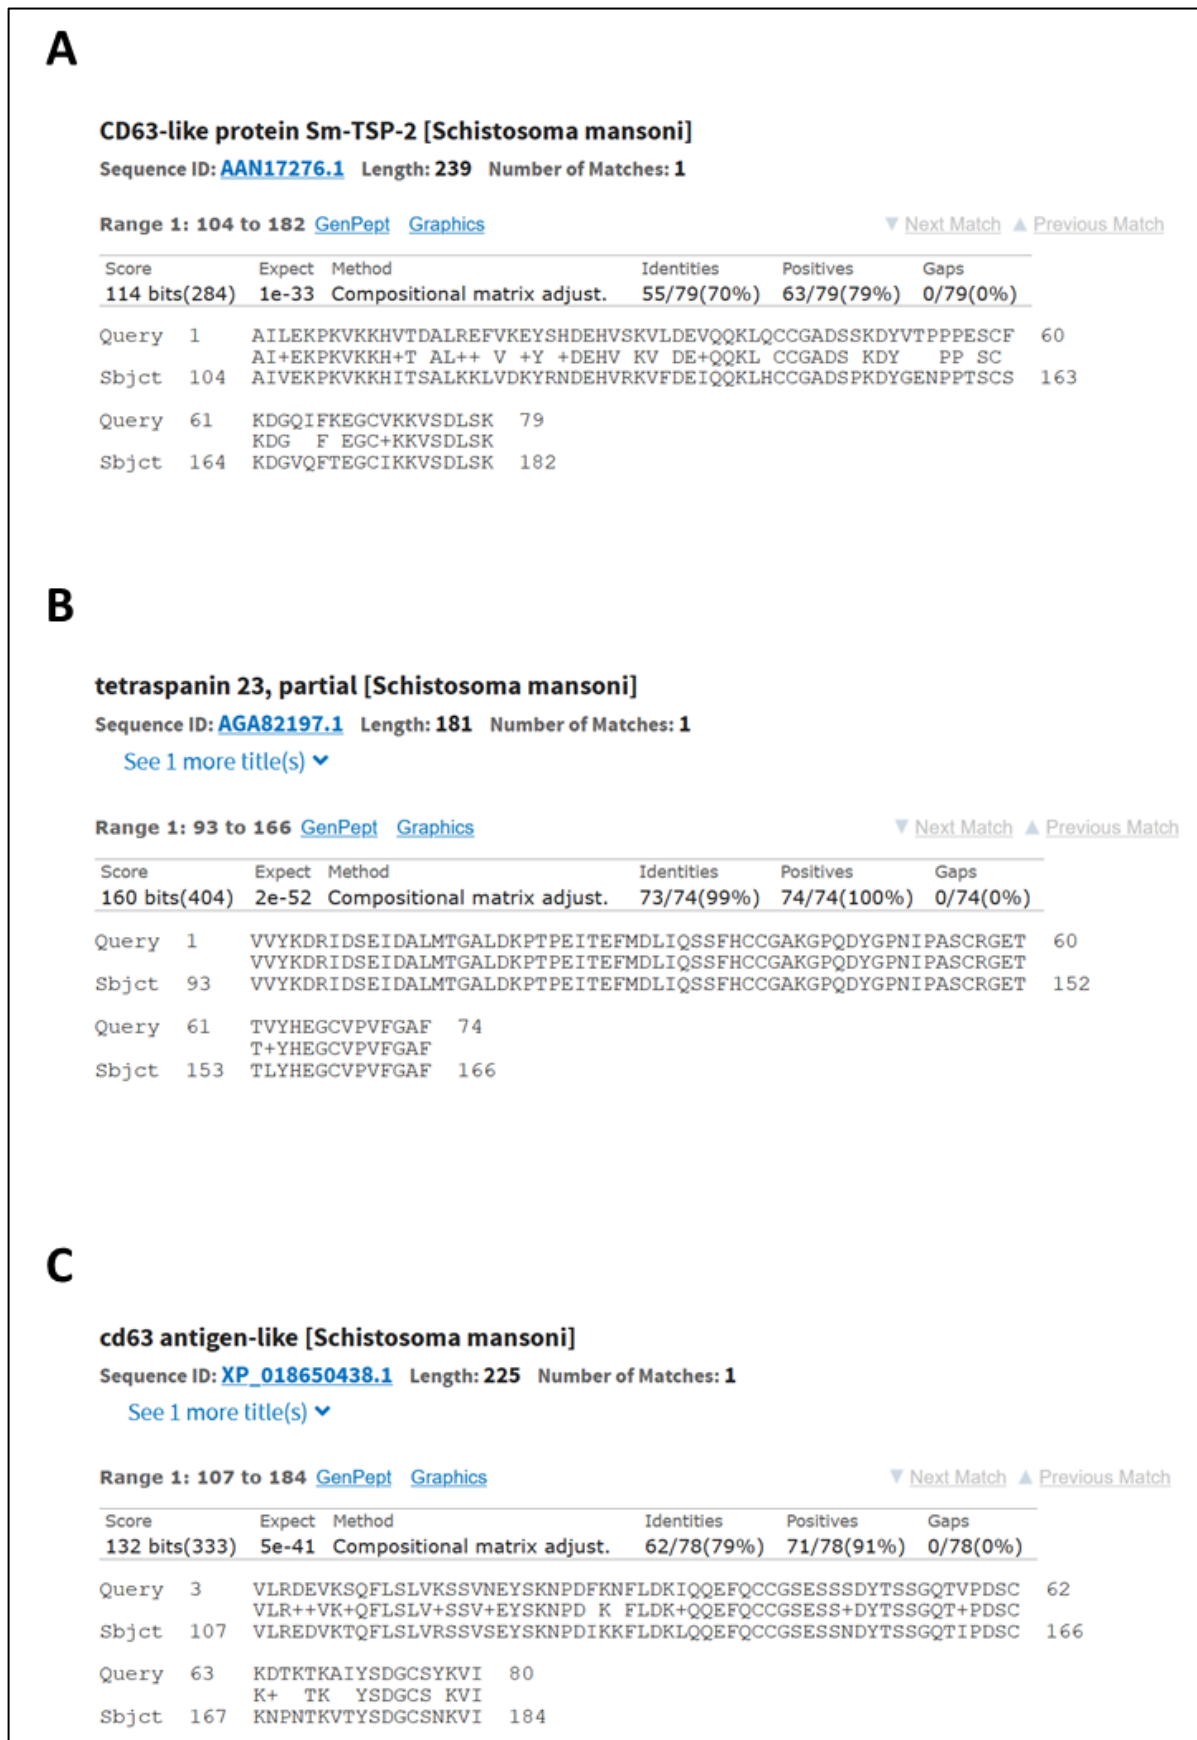

Source: https://www.biorxiv.org/content/biorxiv/early/2020/06/25/2020.06.24.168773.full.pdf
